## RESEARCH ARTICLE

# Membrane associated proteins of two *Trichomonas gallinae* clones vary with the virulence

María del Carmen Martínez-Herrero<sup>1</sup>, María Magdalena Garijo-Toledo<sup>1</sup>, Fernando González<sup>2</sup>, Ivana Bilic<sup>3</sup>, Dieter Liebhart<sup>3</sup>, Petra Ganas<sup>3</sup>, Michael Hess<sup>3</sup>, María Teresa Gómez-Muñoz<sup>1,4\*</sup>

**1** Departamento de Producción y Sanidad Animal, Salud Pública Veterinaria y Ciencia y Tecnología de los Alimentos, Facultad de Veterinaria, Instituto de Ciencias Biomédicas, Universidad CEU Cardenal Herrera, Valencia, Spain, **2** GREFA—Grupo de Rehabilitación de la Fauna Autóctona y su Hábitat, Majadahonda, Madrid, Spain, **3** Clinic for Poultry and Fish Medicine, Department for Farm Animals and Veterinary Public Health, University of Veterinary Medicine Vienna, Vienna, Austria, **4** Departamento de Sanidad Animal, Facultad de Veterinaria, Universidad Complutense de Madrid, Madrid, Spain

\* [mariateg@ucm.es](mailto:mariateg@ucm.es)

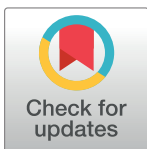

## OPEN ACCESS

**Citation:** Martínez-Herrero MdC, Garijo-Toledo MM, González F, Bilic I, Liebhart D, Ganas P, et al. (2019) Membrane associated proteins of two *Trichomonas gallinae* clones vary with the virulence. PLoS ONE 14(10): e0224032. <https://doi.org/10.1371/journal.pone.0224032>

**Editor:** Maria Gasset, Consejo Superior de Investigaciones Científicas, SPAIN

**Received:** March 20, 2019

**Accepted:** October 3, 2019

**Published:** October 24, 2019

**Copyright:** © 2019 Martínez-Herrero et al. This is an open access article distributed under the terms of the [Creative Commons Attribution License](https://creativecommons.org/licenses/by/4.0/), which permits unrestricted use, distribution, and reproduction in any medium, provided the original author and source are credited.

**Data Availability Statement:** Here you can find details to revise the proteome data at ProteomeXchange: Project Name: Comparative membrane protein composition of *Trichomonas gallinae* clones with different virulence; Project accession: PXD013115; Project DOI: [10.6019/PXD013115](https://doi.org/10.6019/PXD013115). All relevant data behind the means, standard deviations and other measures reported and also data to build the graphs are included in [S1 Data](#).

## Abstract

Oropharyngeal avian trichomonosis is mainly caused by *Trichomonas gallinae*, a protozoan parasite that affects the upper digestive tract of birds. Lesions of the disease are characterized by severe inflammation which may result in fatality by starvation. Two genotypes of *T. gallinae* were found to be widely distributed in different bird species all over the world. Differences in the host distribution and association with lesions of both genotypes have been reported. However, so far no distinct virulence factors of this parasite have been described and studies might suffer from possible co-infections of different genotypes. Therefore, in this paper, we analyzed the virulence capacity of seven clones of the parasite, established by micromanipulation, representing the two most frequent genotypes. Clones of both genotypes caused the maximum score of virulence at day 3 post-inoculation in LMH cells, although significant higher cytopathogenic score was found in ITS-OBT-Tg-1 genotype clones at days 1 and 2, as compared to clones with ITS-OBT-Tg-2. By using one representative clone of each genotype, a comparative proteomic analysis of the membrane proteins enriched fraction has been carried out by a label free approach (Data available via ProteomeXchange: PXD013115). The analysis resulted in 302 proteins of varying abundance. In the clone with the highest initial virulence, proteins related to cell adhesion, such as an immuno-dominant variable surface antigen, a GP63-like protein, an armadillo/beta-catenin-like repeat protein were found more abundant. Additionally, Ras superfamily proteins and calmodulins were more abundant, which might be related to an increased activity in the cytoskeleton re-organization. On the contrary, in the clone with the lowest initial virulence, larger numbers of the identified proteins were related to the carbohydrate metabolism. The results of the present work deliver substantial differences between both clones that could be related to feeding processes and morphological changes, similarly to the closely related pathogen *Trichomonas vaginalis*.

**Funding:** This research has been partially financed by the Spanish Ministry of Science and Innovation (Grant AGL2011-29442), the University CEU Cardenal Herrera (Grants PRCEU-UCH 27/10 and 41/11) and Banco de Santander (Santander-PRCEU-UCH 23/23). María del Carmen Martínez Herrero has a predoctoral fellowship from the Conselleria of Education, Culture and Sport of the Valencia Community (Grant ACIF/2013/055, engagement of predoctoral research personnel VALi+D) and fellowships for research stays (BEFPI/2014/060, BEFPI/2015/037 and BEFPI/2016/025). The proteomic analysis was performed in the Proteomics Facility of UCM that belongs to ProteoRed network, PRB2-ISCI, supported by grant PT13/0001. The funders had no role in study design, data collection and analysis, decision to publish, or preparation of the manuscript.

**Competing interests:** The authors have declared that no competing interests exist.

## Introduction

*Trichomonas gallinae* is a protozoan that affects the upper digestive tract of domestic and wild birds, although columbiformes are considered the principal reservoir of the parasite. The main route of transmission of this flagellated microorganism among columbiformes is feeding chicks with crop milk or sharing food or water sources. Recently, *T. gallinae* has been recognized as the etiological agent of epidemic outbreaks of disease affecting wild finches that spread across Europe and North America [1].

Although *T. gallinae* was described as the etiological agent of avian trichomonosis for some time, the advancement of molecular epidemiology has elucidated the diversity of trichomonads present in the oropharynx of birds in the recent decades. Several genotypes of *T. gallinae* have been described in distinct studies, employing different nomenclature [2–6]. In addition, the occurrence of new or tentative species has been reported, some of them associated with particular avian hosts [2, 5, 7–10]. However, not all of them have been related to lesions and disease. Several factors can influence the development of pathognomonic lesions or clinical signs associated with avian trichomonosis. Among them, the age, previous contact with the parasite, diet and type of host have been reported [1, 6].

Two genotypes of *T. gallinae* are widely distributed among several groups of birds: genotypes A and C [2] which correspond with genotypic groups Internal Transcribed Spacer-Oropharyngeal Bird Trichomonad-*T. gallinae* 1 (ITS-OBT-Tg-1) and Internal Transcribed Spacer-Oropharyngeal Bird Trichomonad-*T. gallinae* 2 (ITS-OBT-Tg-2) [6]. Although both genotypes have been described in clinical cases, ITS-OBT-Tg-1 appears to be more frequently associated with disease [3, 6, 11–13]. However, the virulence of the distinct genotypic groups has been only partially investigated [14].

So far only two studies have been carried out on the proteomics of *T. gallinae* [15, 16]. One of them identified cysteine peptidases related to the pathogenic effect of the parasite in cell cultures [15], while the other predicts glyceraldehyde-3-phosphate hydrogenase (GAPDH) as a promising drug target [16]. In UniProt database there are only 71 annotations for *T. gallinae*, corresponding to 9 proteins. On the contrary, several proteomic studies have been performed with the closely related protozoan *Trichomonas vaginalis*, the etiological agent of the human venereal disease called trichomonosis and more than 50000 proteins have been annotated in UniProt. Some studies have focused on the composition of surface proteins of *T. vaginalis*, since they are involved in several mechanisms of inter-cell communication, such as nutrient acquisition, adhesion to epithelial cells and different virulence mechanisms [17–23]. It is known that several surface protein families are present in *T. vaginalis*: *BspA*-like proteins, surface proteases, variable surface proteins and lectins, together with proteins harboring dual functions in the parasitic cell. *BspA*-like proteins act by binding to epithelial cells in many organisms, including Bacteria, Archea and Eukaryota [17]. Surface proteases participate in inflammation processes, neoplastic mechanisms and cell adhesion, and include cysteine proteases, serine proteases and metalloproteinases such as GP63-like proteins [17, 19, 20–22]. Proteins with dual functionality are called moonlighting proteins, since they are present in different compartments of the cell, including the plasmatic membrane. Among them, GAPDH family and adhesins, a group that englobes the malic enzyme, have been described in *T. vaginalis* [17, 21].

The membrane system of the cells is composed of the cell outer membrane and associated proteins, including proteins of the membrane associated organelles. Extensive vesicular traffic occurs connecting the organelles one to each other and also to the outside of the cells and many signaling pathways take place there. Although some membrane proteins are known to be present in both, *T. vaginalis* and *T. gallinae*, it is reasonable to expect that many others are

specific and not easily identifiable by comparison, due to the difference in host (man and birds).

In this paper, we have chosen seven clones of the two main genotypic groups of *T. gallinae*, and analyzed the virulence by *in vitro* cell culture-based assay. According to their initial virulence, two isolates were further selected for a comparative proteomic analysis. The ability of *T. gallinae* to change its shape and adhere to epithelial cells, together with excretion of cysteine peptidases, are essential characteristics for virulence [1, 15]. Thus, the knowledge of the protein composition of the membrane is crucial to elucidate those processes. Therefore, the aim of the present work was to analyze differences in the enriched membrane proteins fraction after sub-cellular fractionation of the trophozoites.

## Material and methods

### Isolates, culture and preservation

Isolates of *T. gallinae* were obtained in the context of routine diagnosis of avian trichomonosis in the wildlife recovery center of GREFA (Madrid, Spain). Veterinary supervision and care of wild animals, as well as samples for disease diagnosis, are routine procedures for all the animals at admission. Bird samples were collected by veterinarians by gentle rubbing sterile cotton swabs in the oropharynx of birds and subsequently cultured in 5 ml of fresh TYM (Trypticase Yeast Maltose) medium pH 6.5 at 37°C containing 10% inactivated fetal bovine serum (FBS) (Sigma-Aldrich, St. Louis, Missouri, USA), antibiotics (36 mg/l each of ticarcillin, vancomycin and ceftiofur) and 10,000 IU/ml nystatin (Sigma, St. Louis, Missouri, USA). The tubes were monitored daily using an inverted microscope for the presence of viable trichomonads, for a maximum period of 15 days. Aliquots of 1 ml of each culture were kept for DNA isolation of the original isolate.

Passages were performed every 48 hours using 100 µl of sample, until bacterial or fungal contamination was controlled, usually after 3–6 passages. The presence of bacteria and fungi was examined using Nutrient agar (Scharlab, S.L., Barcelona, Spain) and Sabouraud agar (bio-Mérieux, Madrid, Spain) by plating 100 µl of culture on each agar plate. Nutrient agars were incubated at 37°C for 24 hours, while Sabouraud agars were maintained preserved from light at 22°C for 15 days.

Preservation of the isolates was done using 5% of dimethyl sulfoxide (DMSO, Sigma-Aldrich, St. Louis, Missouri, USA) in TYM medium. The cryovials were placed in a freezing container that provided a slow cooling rate (-1°C/min) in a -80°C freezer. For long term storage (>12 months) samples were transferred into a -150°C freezer.

### Establishment of clonal cultures

The isolates used in the present work were selected based on their origin: three isolates were obtained from animals with macroscopic lesions characteristic for avian trichomonosis and four isolates were obtained from animals without macroscopic lesions (Table 1).

Each isolate was thawed in LMH culture medium consisting of medium 199 (M199) supplemented with Earle's salts, 100 mg/ml L-glutamine, 25mM HEPES, L-amino acids (Gibco™, Thermo Fisher Scientific, Vienna, Austria), 0.22% of sterilized rice starch (Carl-Roth, Karlsruhe, Germany) and 15% of heat inactivated fetal bovine serum (Sigma, EEUU). *Escherichia coli* DH5α-T1 incubated in a horizontal rotating incubator at 37°C in the supplemented medium for 24 hours was added to the cultures in a proportion of 1/20 (v/v) (LMH culture medium), before inoculation of the parasites. Prior to the establishment of the clonal culture by a previously described micromanipulation procedure [24], the original isolates were

**Table 1. MLST of selected clonal cultures.**

| ITS Type (2, 6)        | SSU-Type (4)      | Fe.hydrogenase Type (13) | Clone <sup>1</sup> | Gross Lesions <sup>2</sup> | Host                         |
|------------------------|-------------------|--------------------------|--------------------|----------------------------|------------------------------|
| A (2) ITS-OBT-Tg-1 (6) | KM095107          | A1 (JF681136)            | R193-13 C3         | Yes                        | <i>Falco tinnunculus</i>     |
|                        |                   |                          | P95-13 C3          | No                         | <i>Streptopelia decaocto</i> |
|                        |                   |                          | P349-12 C11        | Yes                        | <i>Columba palumbus</i>      |
|                        |                   |                          | R17-12 C1          |                            | <i>Bubo bubo</i>             |
| C (2) ITS-OBT-Tg-2 (6) | 18S-II (EU215373) | C4 (KC529662)            | R44-12 C5          | No                         | <i>Accipiter gentilis</i>    |
|                        | 18S-II (EU215374) | C2.1 KP900032            | R24-12 C10         |                            | <i>Falco tinnunculus</i>     |
|                        | 18S-II (EU215373) | C4 (KC529662)            | P178-13 C7         |                            | <i>Columba palumbus</i>      |

MLST of clonal cultures selected for virulence assays in LMH cells. References are included in parenthesis.

<sup>1</sup> Clone Code, the first letter refers to bird species prey (P) or raptor (R). The first two or three digits refer to the laboratory internal code and the last two digits to the sampling year. The letter C refers to the number of clone obtained from each isolate.

<sup>2</sup> Gross Lesions in the oropharyngeal cavity.

<https://doi.org/10.1371/journal.pone.0224032.t001>

cultivated for a short period of time (maximum 7 passages). Passages of the cultures were done every 48–72 hours.

One day before the micromanipulation procedure, 0.5 ml of each *Trichomonas* isolate culture was transferred into 9 ml of LMH culture medium supplemented with *E. coli*. At 24 hours post-inoculation, 20 µl of these cultures were carefully placed on glass slides and diluted with pure M199 in order to have a clear suspension of trophozoites. The selection of single trichomonad cells was done under an inverted microscope (Diaphot 300, Nikon, Austria) by a micromanipulator (Narishige, Japan). Single active trophozoites were retained by negative pressure with a micropipette. Each single trophozoite was deposited in a drop of M199 to visualize the correct selection of the cell and then transferred to a micro tube with 0.5 ml of LMH culture medium supplemented with *E. coli*. The tubes were incubated at 37°C and examined every 48 hours for trophozoite growth. Positive clonal cultures were transferred into 9 ml of LMH culture medium supplemented with *E. coli* for successive culturing and cryo-preservation until use.

Clones of the genotypic group ITS-OBT-Tg-1, obtained from animals with lesions, including R17-12 C1 from a Eurasian eagle-owl (*Bubo bubo*), R193-13 C3 from a common kestrel (*Falco tinnunculus*) and P349-12 C11 from a common wood pigeon (*Columba palumbus*). Clones of the genotypic group ITS-OBT-Tg-2, obtained from animals without lesions, including P178-13 C7 from a common wood pigeon (*Columba palumbus*), R24-12 C10 from a common kestrel (*Falco tinnunculus*) and R44-12 C5 from a northern goshawk (*Accipiter gentilis*). One isolate (P95-13 C3) that belonged to genotype ITS-OBT-Tg-1 was obtained from a bird without clinical signs. The information about clones, including host species of origin, presence of macroscopic lesions and ITS genotypes is shown in Table 1. From each isolate, between 6 and 25 clones were successfully established. One clone from each isolate was selected for the virulence assays.

**Axenization procedure.** Since clonal *T. gallinae* trophozoites were cultured in the presence of *E. coli*, penicillin, streptomycin and meropenem (Sigma-Aldrich, St. Louis, Missouri, USA) were added for the axenization procedure according to Amin et al. [24]. Tryptose-soy-agar (TSA) and tryptose-phosphate-broth with 0.2% of agar (TPB, Gibco™, Thermo Fisher Scientific, California, USA) were used to monitor bacterial and fungal contamination (Scharlab, S.L., Barcelona, Spain). TSA plates and TPB tubes were incubated 24 h at 37°C before examination. Once the trophozoites were growing axenically, they were transferred to Hollander Fluid medium at pH 7.2 (HF medium) [24].

## DNA isolation and genetic characterization of the isolates and clonal cultures

DNA was extracted from 1 ml of the initial parasite culture or at passage level <3. From clonal cultures, 1 ml was also used for DNA extraction after the axenization process was completed. DNeasy blood and tissue extraction kit (QIAGEN, Valencia, California, USA) was employed following the manufacturer's instructions and DNA was stored at -20°C until use.

**ITS1/5.8S rRNA/ITS2 (ITS) PCR.** The protocol of Felleisen [25] was applied for amplification and sequencing of the ITS1/5.8S rRNA/ITS2 region using primers TFR1 (5' -TGCTTCAGCTCAGCGGGTCTTCC-3') and TFR2 (5' -CGGTAGGTGAACCTGCCGTTGG-3'). PCR reaction was carried out in 50 µl with 5 µl of 10x PCR buffer, 1.5 mM of MgCl<sub>2</sub>, 2 mM of dNTP, 2 µM of each primer, 2.5 IU of Taq polymerase (MP, Thomas Scientific, Swedesboro, New Jersey, USA) and 5 µl of genomic DNA. PCR protocol was as follows: initial denaturation step at 95°C for 9 min followed by 40 cycles of denaturation for 30 s at 94°C, annealing at 66°C for 30 s, extension at 72°C for 30 s and a final extension step at 72°C for 15 min. Positive and negative controls were included in each PCR reaction set.

**Small subunit of ribosomal RNA (SSUrRNA) PCR.** Amplification of the SSUrRNA was carried out using the protocol of Ganas et al. [26] and the primers HM long f (5' -AGGAAGCACACTATGGTCATAG-3') and HM long r (5' -CGTTACCTTGTTACGACTTCTCCTT-3'). The PCR was performed in 50 µl composed of 25 µl of HotStarTaq Master Mix kit polymerase (QIAGEN, Hilden, Germany), 16 µl of PCR water (QIAGEN, Hilden, Germany), 2 µl of each primer at 10 µM and 5 µl of genomic DNA. The temperature profile was as follows: 15 min at 95°C for initial denaturation, 40 cycles of 30 s at 94°C, 1 min at 55°C, 2 min at 72°C and a final extension step of 10 min at 72°C. Positive and negative controls were included in each PCR reaction set.

**Fe-hydrogenase gene (FeHyd) PCR.** For this genetic marker the same PCR reaction mix as for the SSUrRNA was prepared according to Lawson et al. [12] with the following primers: TrichhydFOR (5' -GTTTGGGATGGCCTCAGAAT-3') and TrichhydREV (5' -AGCCGAAGATGTTGTCGAAT-3'). The thermal cycler was programmed for: 15 min at 95°C for initial denaturation, 40 cycles of 30 s at 94°C, 1 min at 58°C, 2 min at 72°C and lastly, 10 min at 72°C. Positive and negative controls were included in each PCR reaction set.

**Sequencing.** Amplicons were purified with a MiniElute PCR purification kit (QIAGEN, Valencia, California, USA) and submitted for Sanger sequencing to Sistemas Genómicos S.A., Valencia, Spain. An automatic sequencer (3730XL DNA analyzer, Applied Biosystems, Foster City, California, USA) was employed using the ABI PRISM BigDye® Terminator Cycle sequencing kit (Applied Biosystems, Foster City, California, USA). Sequencing was carried out in both directions of DNA and the resultant chromatograms were assembled and manually checked using Lasergene SeqMan software version 7.0.0 (DNASTAR, Madison, Wisconsin, USA). Alignment was done using the BLAST online resource of the NCBI.

## Virulence assays of *T. gallinae* clonal cultures in LMH cells

**LMH cell culture.** The chicken hepatocellular carcinoma cell line (LMH) was used for virulence assays, since it provided a suitable system for the *in vitro* pathogenicity testing of *T. gallinae* [14]. LMH cells were cultured in RPMI-1640 supplemented with 10% FBS, 40,000 IU/ml penicillin and 40 mg/ml streptomycin (Gibco™, Thermo Fisher Scientific, California, USA). Cells were incubated in 5% CO<sub>2</sub> and 85–90% humidity at 37°C.

Ten ml of medium with an initial inoculum of 1.4 x 10<sup>6</sup> cells were cultured in 25 cm<sup>2</sup> filtered cap flasks (Nunc™, Thermo Fisher Scientific, California, USA). The cultures were split every 3–4 days by adding 2 ml of a trypsin solution (0.05% of trypsin in 0.53 mM EDTA,

Thermo Fisher Scientific, California, USA) for 3–5 min followed by washing of the cells in 50 ml of sterile PBS (pH 7.2). After centrifugation at 1,300 rpm for 5 minutes the cells were suspended in 10 ml of fresh medium. To assess cell viability, trypan blue exclusion was used (Sigma-Aldrich, St. Louis, Missouri, USA).

**Inoculation of LMH cells.** Prior to the inoculation with trichomonads, LMH cell cultures were washed with sterile PBS and 6.5 ml of pre-warmed M199 supplemented with 10% FBS, 10% TPB and penicillin-streptomycin solution. LMH cells were used for inoculation of trophozoites when 95% confluence was obtained (monolayer stage).

An inoculum of 10,000 axenized viable trophozoites was used in each flask of LMH cell cultures in monolayer. Three replicates were performed for each clone together with flasks with solely trophozoites as positive controls and flasks with solely LMH cells as negative controls. The cultures were incubated for five days and the number of trophozoites was determined every 24 hours.

**Determination of cytopathogenic effect.** The cultures were monitored by an inverted microscope for five days to assess the cytopathogenic effect. In parallel, the parasites were counted by trypan blue exclusion every 24 hours. Cytopathogenic effects (CPE) were scored according to Amin et al. [14]: CPE1:  $\leq 25\%$  of monolayer destruction, CPE2: 25–50% of monolayer destruction, CPE3: 50–75% of monolayer destruction and CPE4:  $>75\%$  of monolayer destruction.

**Statistical analysis.** Wilcoxon signed rank test was employed for statistical significance in the growth of trophozoites with or without LMH cells. Categorical data for CPE scores grouped by ITS genotype were analyzed using the Chi square test of association ( $p$ -value  $< 0.01$ ). All analyses were performed with the IBM SPSS Statistics software version 22 (IBM Corp., Armonk, New York, USA).

### Subcellular fractionation and protein extraction and quantification

Based on the virulence assays, two of the clonal cultures of *T. gallinae* were selected for the proteomic analysis: at 24h p.i. clone R17-12 C1 showed the highest CPE score (4) whereas P178-13 C7 caused the lowest CPE score (1).

***T. gallinae* mass culture and harvest.** Three biological replicates were performed with each clone. The clones were thawed in LMH culture medium supplemented with *E. coli* at 37°C. The parasites were progressively axenized as previously described and adapted to TYM medium. Mass cultures were generated by the inoculation of  $1 \times 10^5$  axenic trophozoites in 40 ml of TYM medium on 20 Falcon tubes of 50 ml and harvested at the end of the log phase (48 hours). In this case, trophozoites grew in TYM medium without antibiotics and antifungals. Clone R17-12 C1 was at passage 9 and clone P178-13 C7 at passage 11. Cell viability was assessed at 24 and 48 hours by trypan blue exclusion. Between  $1.1 \times 10^8$  and  $1.7 \times 10^7$  trophozoites were harvested from each Falcon tube by centrifugation at 2,000 rpm for 5 min and then washed 3 times with sterile PBS (pH 7.2) at 4°C to remove growth medium. The obtained cell pellets were used for subsequent subcellular fractionation.

**Subcellular fractionation.** The commercial subcellular fractionation kit ProteoExtract™ Subcellular Proteome Extraction kit (Calbiochem™, Merck KGaA, Darmstadt, Germany) was employed for this purpose. Manufacturer instructions were followed to avoid protein degradation. Briefly, cells were suspended with protease inhibitor cocktails and a series of extraction buffers that dissolved different proteome fractions were applied. Firstly, soluble proteins corresponding to the cytosolic fraction were extracted. Then, the fraction containing membrane and membrane-bound organelles proteins was obtained. Thirdly, nuclear proteins and the cytoskeletal fraction were recovered. During the procedure the samples were kept on ice to

avoid protein degradation. Incubation was done in mechanical agitators to assess the correct distribution and solubilization of the extraction buffers. The obtained fractions were kept at  $-80^{\circ}\text{C}$  for further analysis. Fraction two (enriched membrane proteins fraction) was used for this study.

**Protein precipitation and quantification.** The enriched membrane proteins fraction was gradually thawed from  $-80^{\circ}\text{C}$  to  $4^{\circ}\text{C}$  and kept on ice for acetone precipitation. Six volumes of acetone at  $-20^{\circ}\text{C}$  were added to one volume of sample. The mix was kept at  $-20^{\circ}\text{C}$  for 4 hours and then centrifuged at 8,000 rpm for 10 minutes. Acetone was carefully poured from the tube and the pellet was kept at  $-80^{\circ}\text{C}$ . For solubilization, samples were suspended in  $100\ \mu\text{l}$  of 8M urea. Protein quantification was done by the RC DC™ Protein Assay (Bio-Rad Laboratories, Hercules, California, USA). The same amount of protein was used for each replicate of the clones before performing further analysis.

**SDS-PAGE preliminary analysis.** A preliminary analysis by a 12% SDS-PAGE gel using  $10\ \mu\text{g}/\text{lane}$  of each sample from the enriched membrane proteins fraction of the two selected clones were loaded to compare the protein pattern of the clones. The same amount of protein was loaded from each replicate as a quality control for the protein quantification. Precision Plus Protein™ Standards Dual Color de (Biorad, Alcobendas, Spain) were used as molecular weight markers.

**Digestion and desalting of the peptides.** Thirty mg of sample from each replicate were reduced with 10 mM of dithiothreitol (DTT) at  $37^{\circ}\text{C}$  for 30 minutes. Proteins were alkylated with 55 mM of iodoacetamide in the dark for 20 min. Protein digestion was carried out with 1/30 (w/w) of trypsin (recombinant trypsin sequencing grade, Roche) and left overnight at  $37^{\circ}\text{C}$  [27]. Digested peptides were desalted and concentrated by reverse chromatography (C18 OMIX pipette tips, Agilent Technologies, Germany). Peptides were eluted with 50% acetonitrile (ACN) and 0.1% of trifluoroacetic acid. Finally, the samples were dried in a speed-vac and resuspended in 0.1% of formic acid before de Nano LC-MS/MS analysis. Samples were stored at  $-20^{\circ}\text{C}$  for further procedures.

**Label free experimental design.** Three biological replicates were used from each clone. A total of two technical replicates of each biological replicate were analyzed, except for one technical replicate of clone R17-12 C1 (R17-R1-2) which had an insufficient amount of protein. From clone R17-12 C1 samples R17-R1-1, R17-R2-1, R17-R2-2, R17-R3-1 and R17-R3-2 were employed, while from clone P178-13 C7 samples P178-R1-1, P178-R1-2, P178-R2-1, P178-R2-2, P178-R3-1 and P178-R3-2 were used (Fig 1).

**LC-MS/MS analysis (LTQ-Orbitrap-Velos-Pro).** The desalted peptides samples were analyzed by RP-LC-MS/MS in an Easy-nLC II system coupled to an ion trap LTQ-Orbitrap-Velos-Pro mass spectrometer (Thermo Fisher Scientific, California, USA). The peptides were concentrated (on-line) by reverse phase chromatography using a  $0.1\ \text{mm} \times 20\ \text{mm}$  C18 RP precolumn (Thermo Scientific, California, USA), and then separated using a  $0.075\ \text{mm} \times 250\ \text{mm}$  C18 RP column (Thermo Scientific, California, USA) operating at  $0.3\ \mu\text{l}/\text{min}$ . Peptides were eluted using a 180-min gradient from 5 to 40% solvent B (Solvent A: 0.1% formic acid in water, solvent B: 0.1% formic acid and 80% ACN in water). For peptide electrospray ionization (ESI) a nanoelectrospray source and 30 mm capillary emitters were employed (Nano-bore emitters stainless steel ID  $30\ \mu\text{m}$ , Proxeon, Thermo Fisher Scientific, California, USA).

The mass spectrometer was run in data-dependent positive ionization for automatically detection from MS to MS/MS spectra (LTQ-Orbitrap-Velos-Pro). Peptides were detected with a 30,000 resolution in full scan MS mode with 400–1,600 atomic mass units (amu). A maximum of 15 dependent MS/MS scans were selected according to their intensity. An isolation width of  $\pm 2$  mass-to-charge ratio units (m/z), normalized collision energy of 35% and dynamic exclusion were applied for periods of 30 seconds.

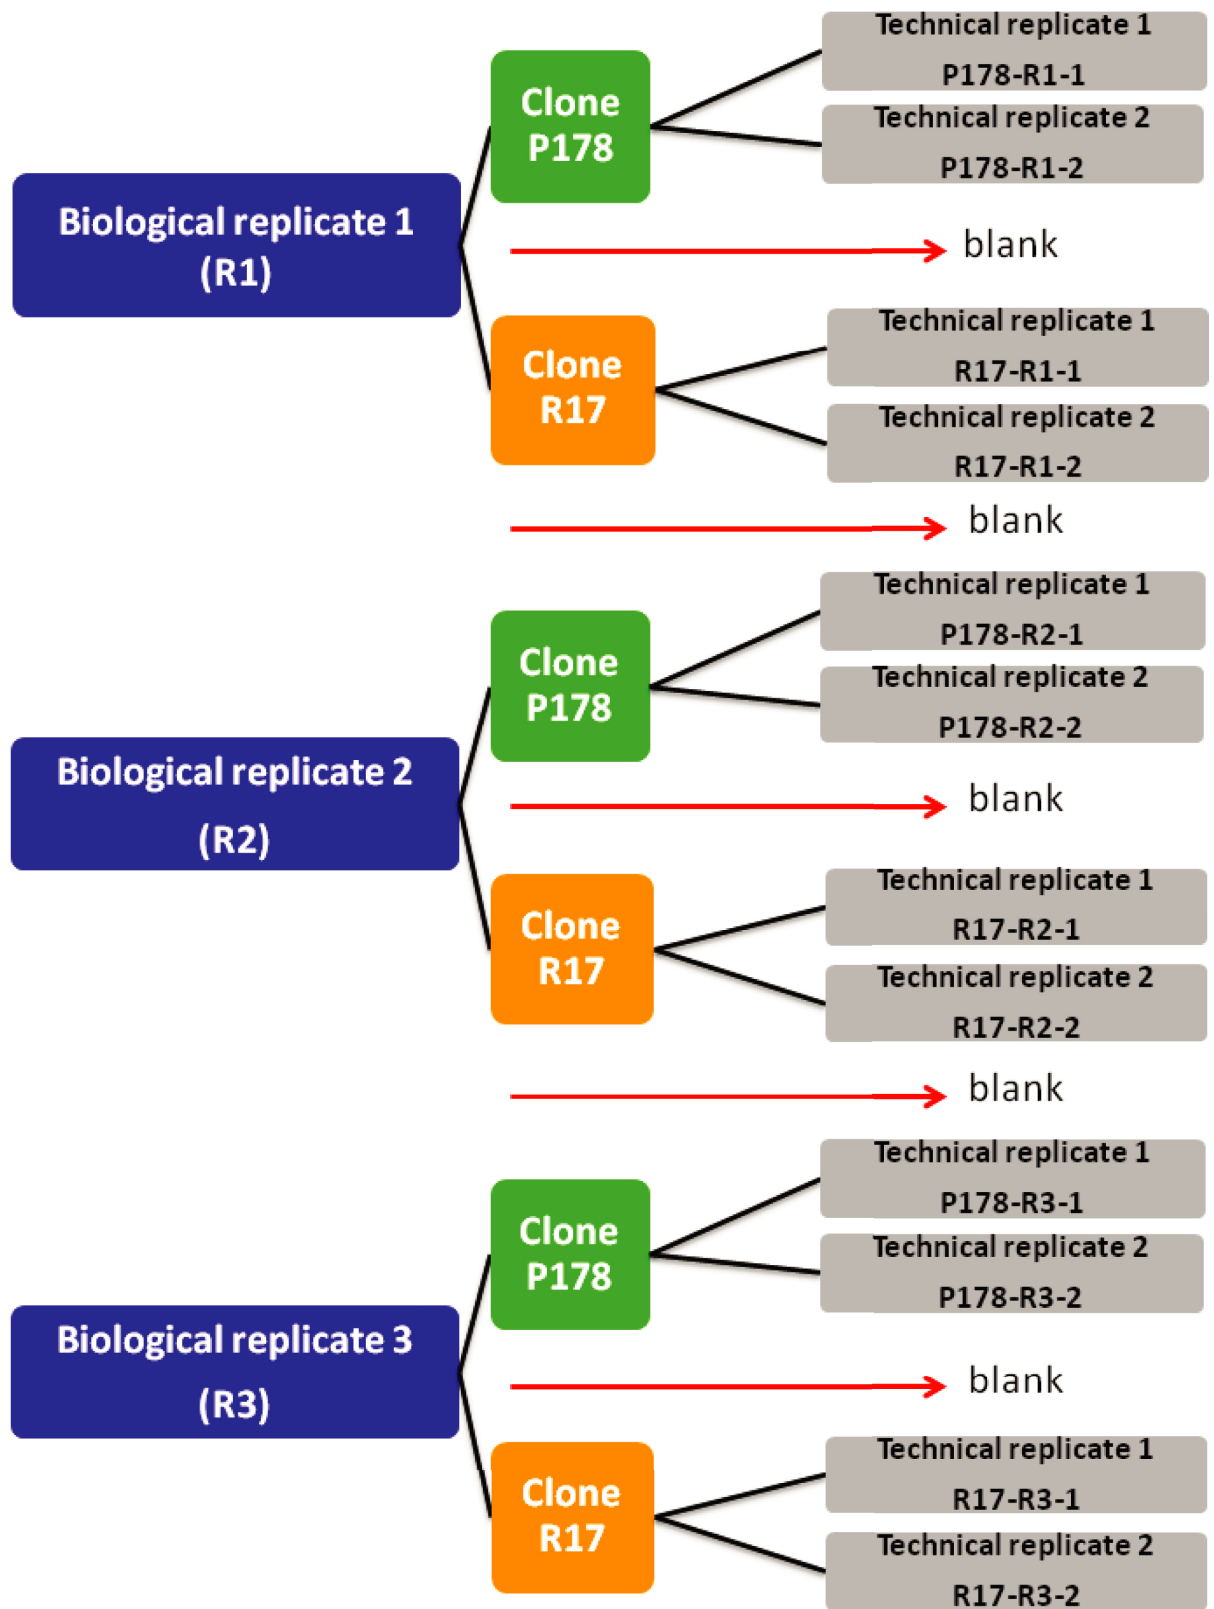



**Fig 1. Experimental design for comparative label free proteomic analysis.** Experimental design for label free proteomic analysis comparing identified proteins of the enriched membrane protein fraction of clones R17-12 C1 and P178-13 C7.

<https://doi.org/10.1371/journal.pone.0224032.g001>

The mass spectrometry proteomics data have been deposited to the ProteomeXchange Consortium via the PRIDE [28] partner repository with the dataset identifier PXD013115 and 10.6019/PXD013115.

## Peptide identification and relative quantification

**Peptide identification.** Peptide identification from raw data was carried out using licensed version of search engine MASCOT 2.3.0 thorough Proteome Discoverer™ 1.4 (Thermo Fisher Scientific, California, USA). The non-redundant NCBI protein database with taxonomic restriction to family trichomonadidae (103,432 protein sequences) was selected for further analysis, since no specific database of *T. gallinae* was available and *T. vaginalis* is a phylogenetically closely-related organism with a broad database available. The search was optimized with the following criteria: 20 ppm of tolerance for precursor ions and 0.8 Da for MS/MS fragment ions, tryptic cleavage after arginine and lysine, up to two missed cleavage sites allowed, optional modification of methionine oxidation and fixed modification of carbamidomethylation of cysteine. Search against decoy database (integrated decoy approach) was used to False Discovery Rate (FDR) estimation and MASCOT percolator filter were applied to MASCOT results. Acceptance criteria for protein identification were FDR < 1% and at least two peptides identified with a confidence interval (CI) > 95% ( $p$ -value < 0.01).

**Protein relative quantification.** Progenesis QI software version 4.1 (Nonlinear Dynamics, Waters company, Newcastle upon Tyne, UK) was employed for the relative quantification of the identified proteins. This program detects and quantifies all the peptide ions produced in the LC-MS/MS and analyses protein expression. The abundance of a specific protein was calculated as the average normalized abundance of its unique peptides in each run, following the recommendations of the Progenesis users guide. Differential expressed proteins were considered those with a fold change  $\geq 2$  for their average value of normalized intensity ratio.

Predicted protein functions were assigned using the UniProtKB database which includes Swiss-Prot (551,987 protein sequences) and TrEMBL (66,905,753 proteins) (UniProt, 2016). BLAST analysis was performed and Gene Ontology (GO) information entries were used for the inference of biological functions (February 2019). The free software Cytoscape version 3.5.1. was used to represent the association of the identified proteins with their specific functions [29].

## Results

### Isolates and clonal cultures

Seven isolates obtained from the oropharynx of different species were cloned for further investigations of the virulence and subsequent proteomic experiments. Three of them were obtained from birds with lesions and one from a bird without lesions that belonged to genotypic group ITS-OBT-Tg-1. Three other isolates were obtained from animals without lesions and belonged to genotypic group ITS-OBT-Tg-2. Results of the Multilocus Sequence Typing (MLST) analysis of the clones indicated that sequences were identical to other sequences found in other studies, with the exception of 1 single nucleotide polymorphism (SNP) in the ITS region of clone P178-13 C7 (Table 1).

## Virulence assays and growth curves

**Virulence assays in LMH cells.** For the majority of clonal cultures, trophozoites reached the maximum growth at 48 hours post-inoculum (p.i.) in the presence of Leghorn Male Hepatoma (LMH) cell line, with the exception of the clone R44/12 C5 that reached the maximum growth at 72 hours p.i. (Fig 2). After reaching the maximum growth, the number of viable trophozoites started to decrease. The average maximum number of viable trophozoites in the presence of LMH cells ranged between  $1.3 \times 10^7$  and  $1.6 \times 10^7$  parasites per flask (7 ml) for genotypic group ITS-OBT-Tg-1 clones, and between  $1.0 \times 10^7$  and  $1.2 \times 10^7$  trophozoites per flask for genotypic group ITS-OBT-Tg-2 clones (Fig 2). Trichomonads cultivated without LMH cells reached growth peaks at 48 or 72 hours p.i. (Fig 2 and S1 Data). However, the amount of trophozoites per flask was significantly lower than in the presence of LMH cells ( $p$ -value  $< 0.05$ ).

Clones P349-12 C11 and R17-12 C1, of genotypic group ITS-OBT-Tg-1, produced the maximum cytopathogenic effect (CPE) score (4) as early as 24 hours p.i. (Table 2). The other two clones of the same genotypic group, P95-13 C3 and R193-13 C3, were not as virulent 24 hours p.i. and displayed CPE scores 3 and 2, respectively (Table 2). In contrast to the above mentioned clones of ITS-OBT-Tg-1, at 24 hours p.i. all three clones of genotypic group ITS-OBT-Tg-2 displayed low virulence with CPEs scores 1 and 2 (Table 2). At 48 hours, all clones of genotypic group ITS-OBT-Tg-1 reached the maximum score (4) whereas for clones of genotypic group ITS-OBT-Tg-2 the CPE score varied from 2 to 4 (Table 2). There were significant statistical differences on the average CPE score between genotypic groups ITS-OBT-Tg-1 and ITS-OBT-Tg-2 on day 1 and 2 ( $p$ -value  $< 0.01$ , Chi-square Test). However, from the day 3 p.i., all clones showed the maximum CPE (score 4) (Table 2). Two clones were selected for further studies, clone R17-12 C1, with the highest initial virulence, and clone P178-13 C7, with the lowest initial virulence.

**Growth curves in TYM medium.** Growth of trophozoites from the two selected clones in TYM medium reached the maximum value at 72 hours p.i. Although a lower growth was observed in clone R1-12 C1, no significant differences were observed between clones at 24, 48 and 72 hours p.i. (S1 Fig and S1 Data).

## Protein identification

**SDS-PAGE preliminary analysis.** The 1D-SDS-PAGE gels showed minor differences in the protein profile between the two selected clones, consequently, a label-free method of comparison and identification was carried out (S2 Fig).

**LC-MS/MS analysis.** Clones R17-12 C1 and P178-13 C7 were selected according to their initial virulence on cell culture (24h and 72 h to reach the maximum CPE score, respectively) for the comparative analysis of the enriched membrane proteins fraction composition. The mean percentage of matched MS/MS spectra was closed to 2%. Similar chromatogram profiles were obtained for each biological and technical replicate of the same clonal culture, but substantial differences were observed between the peak profiles of the selected clones R17-12 C1 and P178-13 C7 (S3 Fig) (ProteomeXchange: PXD013115).

**Quantification of relative protein abundance and predicted functions.** Proteins identified in every technical and biological replicate from the two clonal cultures, containing more than 2 peptides and a  $p$ -value  $< 0.01$  were quantified. Those with  $\geq 2$  fold change difference in abundance between the two clones were considered different in the analysis and those with  $\geq 3$  fold change difference in abundance were further discussed. In total, of the 750 identified proteins, 302 were found with  $\geq 3$  fold different abundance, of which 132 were more abundant in clone R17-12 C1 and 170 in clone P178-13 C7.

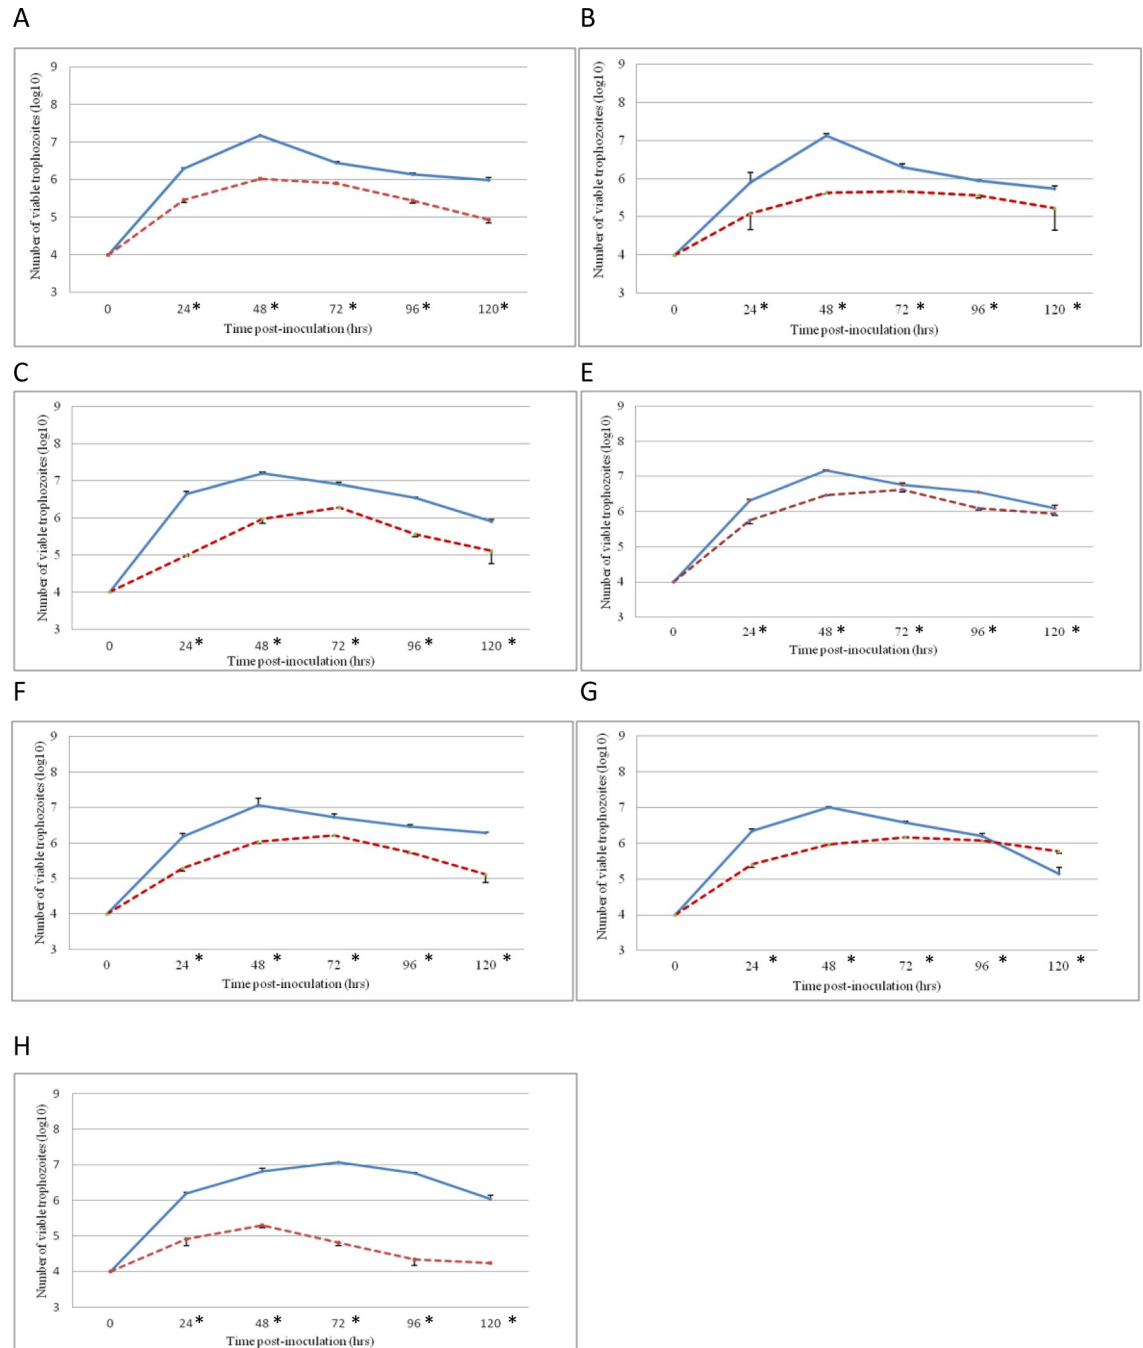

**Fig 2. Growth curves of clones in LMH cells.** Growth curves of *T. gallinae* trophozoites from clonal cultures on LMH cells. Error bars indicate standard deviation. Control flasks containing only trophozoites without LMH cells are indicated in discontinuous lines. A) isolate P349-12 C11, B) isolate P95-13 C3, C) isolate R17-12 C3, D) isolate R193-13 C3, E) isolate P178-13 C7, F) R24-12 C10, G) isolate R44-12 C5. (\*) Significant differences ( $p$ -value < 0.05) between each clone and its control were observed in all the clones.

<https://doi.org/10.1371/journal.pone.0224032.g002>

For the majority of proteins, no information about their subcellular location was available (62% in clone R17-12 C1 and 73% in clone P178-13 C7) (Fig 3). Among the identified proteins more abundant in the ITS-OBT-Tg-1 clone (highest initial virulence score), a higher percentage of cell membrane, cytoskeleton and cytoplasm proteins were detected when compared

**Table 2. Cytopathogenic effect score on LHM cells.**

| Genotype<br>ITS (2, 6) | Clone ( <i>In vitro</i> passage) <sup>§</sup> | CPE score           |    |   |   |   |
|------------------------|-----------------------------------------------|---------------------|----|---|---|---|
|                        |                                               | Days post-infection |    |   |   |   |
|                        |                                               | 1#                  | 2# | 3 | 4 | 5 |
| A (2)ITS-OBT-Tg-1 (6)  | R193-13 C3 * (1 / 27)                         | 2                   | 4  | 4 | 4 | 4 |
|                        | P95-13 C3 (2 / 27)                            | 3                   | 4  | 4 | 4 | 4 |
|                        | P349-12 C11 * (2 / 12)                        | 4                   | 4  | 4 | 4 | 4 |
|                        | R17-12 C1 * (0 / 25)                          | 4                   | 4  | 4 | 4 | 4 |
| C (2)ITS-OBT-Tg-2 (6)  | R44-12 C5 (3 / 14)                            | 2                   | 2  | 4 | 4 | 4 |
|                        | R24-12 C10 (7 / 19)                           | 1                   | 4  | 4 | 4 | 4 |
|                        | P178-13 C7 (1 / 27)                           | 1                   | 3  | 4 | 4 | 4 |

The score of cytopathogenic effect (CPE) detected on LMH cells infected with clonal *T. gallinae* cultures. Scores from 1 (low CPE) to 4 (maximum CPE) were applied. References are included in parenthesis.

\*: indicates clonal cultures derived from isolates of birds with gross lesions.

<sup>§</sup>: *In vitro* passage of the isolate before cloning and after cloning

<sup>#</sup>: statistical significant differences between both genotypes (Chi-square test, *p*-value < 0.01).

<https://doi.org/10.1371/journal.pone.0224032.t002>

with ITS-OBT-Tg-2 clone (lowest initial virulence score) (13%, 9% and 11% respectively in clone R17-12 C1 vs. 8%, 5% and 4% in clone P178-13 C7). On the contrary, ITS-OBT-Tg-2 showed a higher percentage of organelle membrane proteins and nuclear proteins (4% and 1% in clone R17-12 C1 vs. 6% and 5% respectively in clone P178-13 C7).

The group of proteins involved in the cellular metabolism showed the highest abundance, with 33% and 40% of the identified proteins in clones of genotypic groups ITS-OBT-Tg-1 and ITS-OBT-Tg-2, respectively (Fig 4). A large amount of the proteins, being present in both clones, for which no function could be predicted, was retrieved (35%). The percentages of proteins that differed in abundance between both clones and which participate in cell adhesion, DNA replication, exocytosis, signal transduction or translation were similar (2%, 4%, 3/2%, 2/3% and 4%, respectively). Among the identified proteins more abundant in the ITS-OBT-Tg-1 clone, a larger percentage from cellular components and cytoskeleton were identified (10% and 8% in clone R17-12 C1 vs. 5% and 6% in clone P178-13 C7).

**Identified proteins.** The largest group of identified proteins corresponded to hypothetical proteins as inferred from the genome of *T. vaginalis* isolate G3 [30], 42.4% in clone R17-12 C1 and 44.1% in clone P178-13 C7, respectively (S1 and S2 Tables). Although the majority could not be linked to any category or predicted function, some of the proteins were connected to cytoskeleton, protein metabolism, vacuoles, mitochondria, Golgi apparatus, or assembly of ribosomes. Identified proteins based on peptide sequences that differed in abundance between clones were grouped according to their category.

Among proteins identified as more abundant in the clone with the highest initial virulence score (R17-12 C1) (Table 3 and Fig 5) are orthologues of two proteases, the immuno-dominant variable surface antigen-like protease, and the GP63-like protein. These proteases were shown to be involved in cell adhesion of other protozoa and pointed out as virulence factors [17, 22]. In addition, two other proteases have been found more abundant in the clone with the highest initial virulence, Clan SB family S8 subtilisin-like serine peptidase and Clan CA family C2 calpain-like cysteine peptidase. Another important group of identified peptides matched with proteins that belong to the cytoskeleton, like alpha-tubulin, Tctex-1 family protein and the erythrocyte membrane-associated giant protein antigen 332 containing protein. Also, proteins of the Ras superfamily or other components acting in signal transduction were more abundant

A

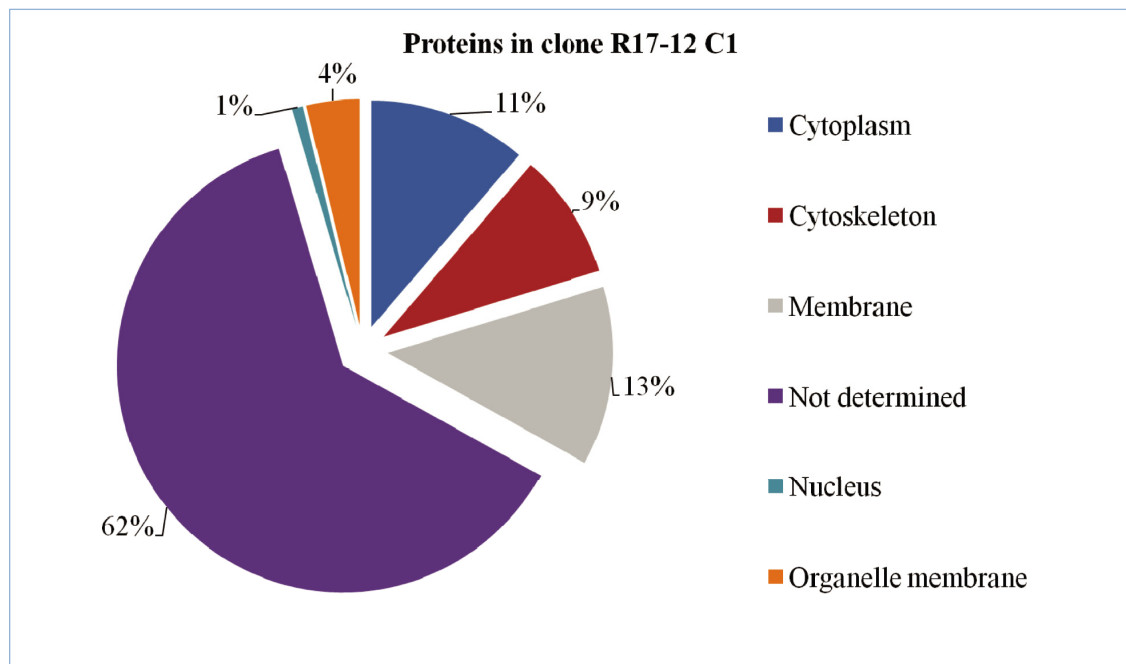

B

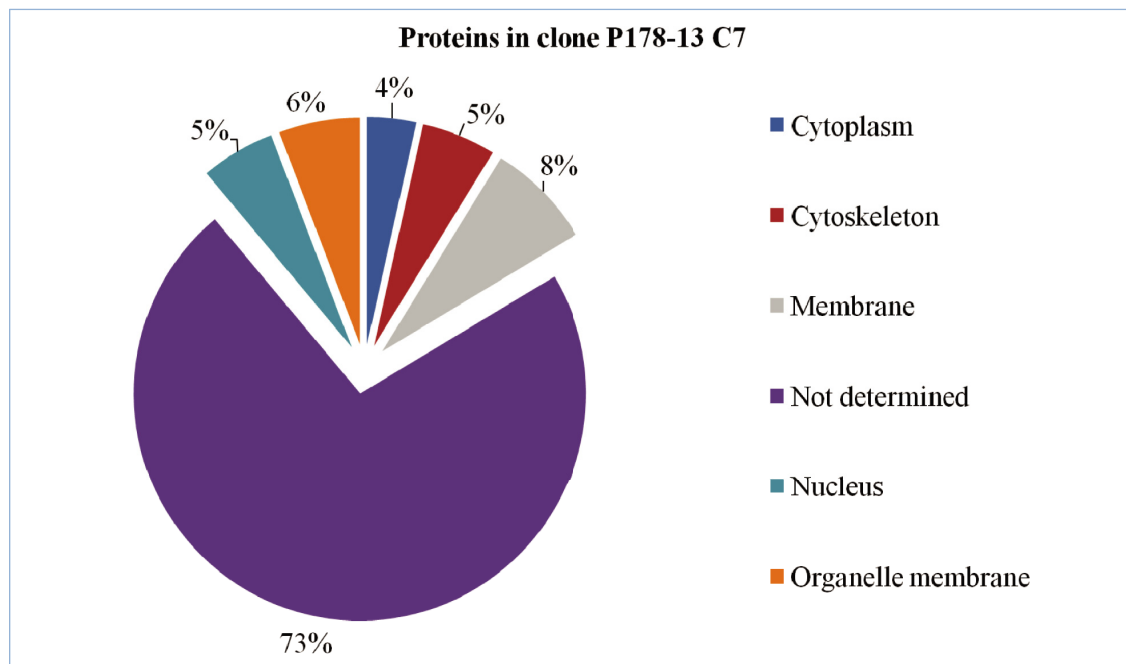

**Fig 3. Identified proteins according to the subcellular location.** Percentage of relatively quantified proteins more abundant A) in clone R17-12 C1 and B) in clone P178-13 C7 when compared to each other, classified according to their subcellular location.

<https://doi.org/10.1371/journal.pone.0224032.g003>

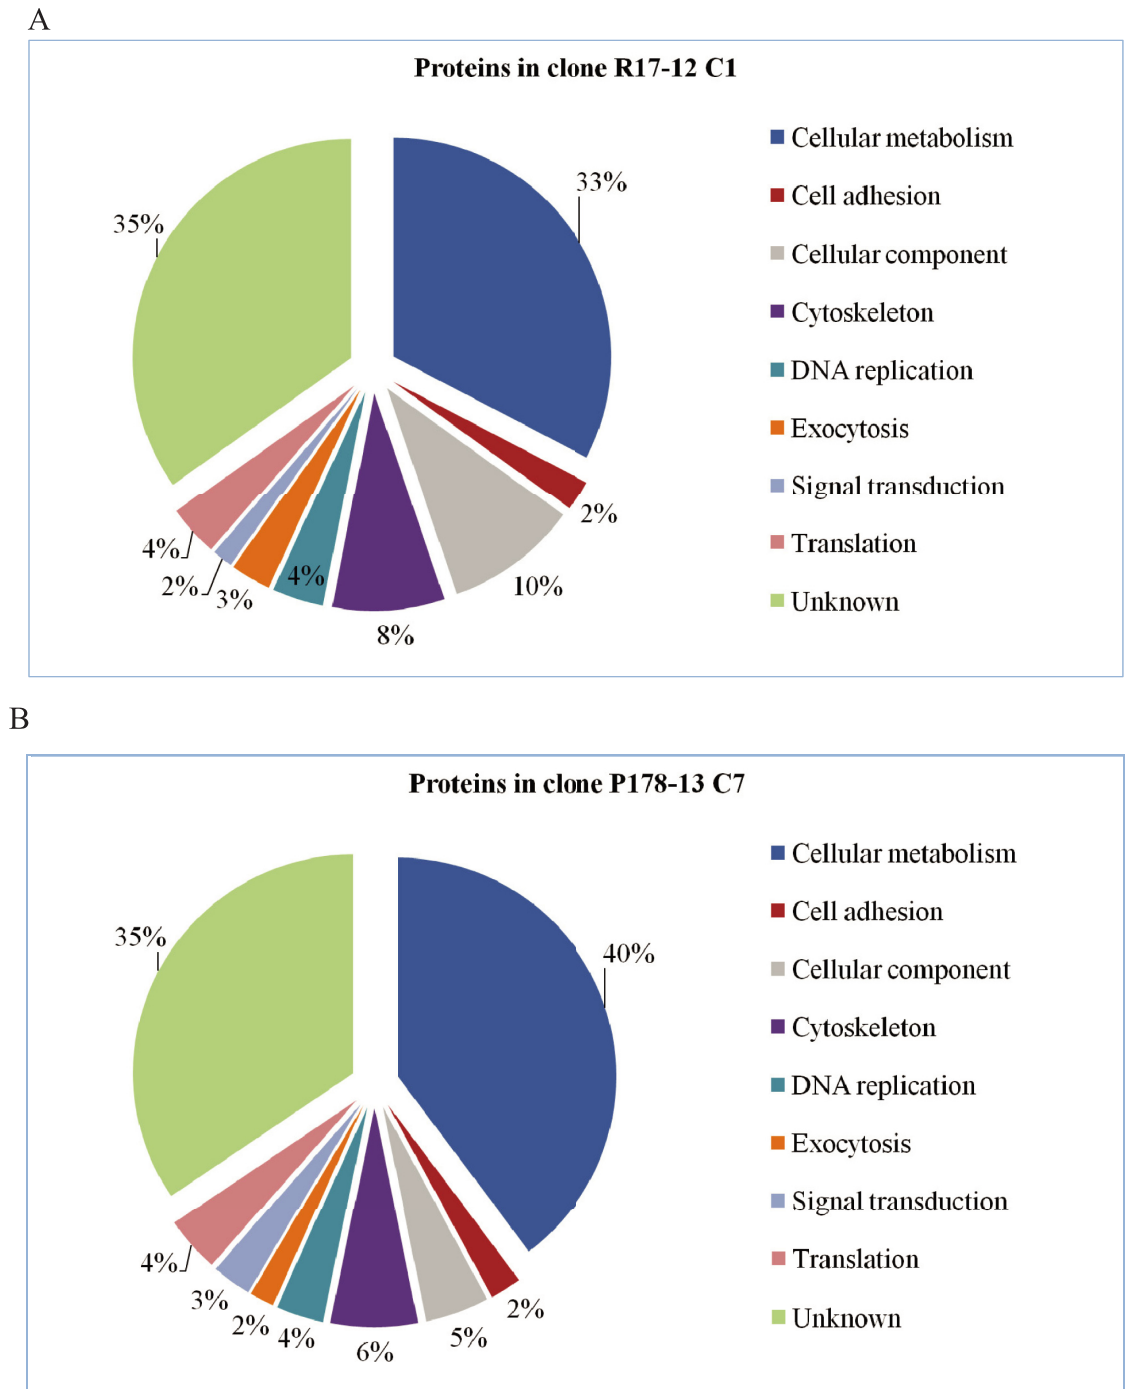

**Fig 4. Identified proteins according to their predicted function.** Percentage of relatively quantified proteins more abundant A) in clone R17-12 C1 and B) in clone P178-13 C7 when compared to each other, classified according to their predicted function category.

<https://doi.org/10.1371/journal.pone.0224032.g004>

in the clone with the highest initial virulence score. This includes RhoGAP domain containing protein, ARF GAP-like zinc finger-containing protein, Ras family protein and RhoGEF domain containing protein. Three calmodulins were also recognized: EF hand family protein, putative calmodulin and putative centrion. Two of the identified proteins potentially participate

Table 3. Proteins more abundant in R17.

| Category            | Predicted Functions                                                                    | Description (cn) <sup>1</sup>                                                                                       | P <sup>2</sup><br>(n) <sup>3</sup> | Score <sup>4</sup> | Clone<br>P178-13<br>C7 | Clone<br>R17-12<br>C1 | Fold<br>Change | ANOVA p<br>Value | Accession<br>Number |
|---------------------|----------------------------------------------------------------------------------------|---------------------------------------------------------------------------------------------------------------------|------------------------------------|--------------------|------------------------|-----------------------|----------------|------------------|---------------------|
| Cell adhesion       | Cell adhesion<br>Protease                                                              | Immuno-dominant variable surface antigen-like [ <i>Trichomonas vaginalis</i> G3] (1)                                | 3 (3)                              | 53,94              | 4,89E+04               | 9,28E+05              | 18,96          | 2,95E-04         | gi 12191712         |
| Cell adhesion       | Cell adhesion<br>Protease                                                              | GP63-like [ <i>Trichomonas vaginalis</i> G3] (2)                                                                    | 2 (2)                              | 38,73              | 6,63E+04               | 5,16E+05              | 7,78           | 3,85E-07         | gi 121892295        |
| Cellular metabolism | Cell adhesion<br>Cytoskeleton<br>Protein metabolism                                    | Armadillo/beta-catenin-like repeat family protein [ <i>Trichomonas vaginalis</i> G3] (3)                            | 2 (2)                              | 26,7               | 1,56E+04               | 7,89E+04              | 5,05           | 2,14E-08         | gi 121911734        |
| Cellular component  | Cytoskeleton                                                                           | alpha-tubulin [ <i>Trichonympha agilis</i> ] (4)                                                                    | 6 (4)                              | 481,79             | 4,81E+04               | 2,01E+05              | 4,18           | 4,92E-03         | gi 496528628        |
| Cellular component  | Cytoskeleton                                                                           | alpha-tubulin 2, partial [ <i>Trichomonas foetus</i> ] (5)                                                          | 3 (1)                              | 115,83             | 5022,1                 | 1,79E+04              | 3,57           | 9,13E-05         | gi 33465441         |
| Cellular component  | Cytoskeleton<br>Vesicle mediated transport                                             | Tctex-1 family protein [ <i>Trichomonas vaginalis</i> G3] (6)                                                       | 4 (4)                              | 142,29             | 8039,24                | 2,53E+04              | 3,15           | 1,17E-06         | gi 121902586        |
| Cellular component  | Cytoskeleton<br>Rho GTPase binding<br>Calmodulin binding                               | Erythrocyte membrane-associated giant protein antigen 332 containing protein [ <i>Trichomonas vaginalis</i> G3] (7) | 3 (3)                              | 58,8               | 1,48E+04               | 1,51E+05              | 10,23          | 7,82E-08         | gi 121905491        |
| Signal transduction | Small GTPase regulator<br>Cytoskeletal protein                                         | RhoGAP domain containing protein [ <i>Trichomonas vaginalis</i> G3] (8)                                             | 2 (2)                              | 32,11              | 1,10E+05               | 5,12E+05              | 4,68           | 1,22E-05         | gi 121898182        |
| Signal transduction | Small GTPase regulator                                                                 | ARF GAP-like zinc finger-containing protein [ <i>Trichomonas vaginalis</i> G3] (9)                                  | 2 (2)                              | 51,31              | 8180,38                | 5,29E+04              | 6,47           | 3,75E-06         | gi 121912557        |
| Signal transduction | Small GTPase regulator                                                                 | RhoGEF domain containing protein [ <i>Trichomonas vaginalis</i> G3] (10)                                            | 2 (2)                              | 37,87              | 6003,78                | 3,60E+04              | 5,99           | 1,62E-05         | gi 121917299        |
| Signal transduction | Small GTPase regulator                                                                 | Ras family protein [ <i>Trichomonas vaginalis</i> G3] (11)                                                          | 4 (4)                              | 273,64             | 3,51E+04               | 1,33E+05              | 3,8            | 4,79E-08         | gi 121900431        |
| Cellular metabolism | Calcium signal modulators                                                              | EF hand family protein [ <i>Trichomonas vaginalis</i> G3] (12)                                                      | 2 (2)                              | 70,33              | 2,55E+04               | 1,03E+05              | 4,06           | 4,41E-07         | gi 121885510        |
| Cellular metabolism | Calcium signal modulators                                                              | calmodulin, putative [ <i>Trichomonas vaginalis</i> G3] (13)                                                        | 3 (3)                              | 202,21             | 1,01E+04               | 3,40E+04              | 3,36           | 5,73E-07         | gi 121905996        |
| Cellular metabolism | Calcium signal modulators                                                              | centrin, putative [ <i>Trichomonas vaginalis</i> G3] (14)                                                           | 3 (3)                              | 83,18              | 1,15E+04               | 3,79E+04              | 3,29           | 1,69E-05         | gi 121913299        |
| Cellular metabolism | Membrane trafficking<br>Signal transduction                                            | C2 domain containing protein [ <i>Trichomonas vaginalis</i> G3] (15)                                                | 2 (2)                              | 36,07              | 7828,24                | 3,91E+04              | 4,99           | 5,52E-03         | gi 121897227        |
| Cellular metabolism | Membrane trafficking<br>Rab GTPase binding<br>Deaminase                                | Vps52 / Sac2 family protein [ <i>Trichomonas vaginalis</i> G3] (16)                                                 | 2 (2)                              | 29,81              | 4624,93                | 3,38E+04              | 7,31           | 1,77E-06         | gi 121902006        |
| Exocytosis          | Vesicle mediated transport                                                             | SNARE protein, putative [ <i>Trichomonas vaginalis</i> G3] (17)                                                     | 2 (2)                              | 94,78              | 1819,33                | 6479,78               | 3,56           | 2,51E-03         | gi 121914867        |
| Exocytosis          | Vesicle-mediated transport<br>Signal transduction                                      | CMGC family protein kinase [ <i>Trichomonas vaginalis</i> G3] (18)                                                  | 2 (2)                              | 48,38              | 2,85E+04               | 1,00E+05              | 3,51           | 1,94E-03         | gi 121882186        |
| Endocytosis         | Vesicle mediated transport                                                             | SacI homology domain containing protein [ <i>Trichomonas vaginalis</i> G3] (19)                                     | 2 (2)                              | 35,91              | 7081,01                | 8,59E+04              | 12,12          | 1,50E-05         | gi 121895312        |
| Cellular metabolism | Carbohydrate metabolic process                                                         | Malate dehydrogenase: SUBUNIT = A, putative [ <i>Trichomonas vaginalis</i> G3] (20)                                 | 4 (4)                              | 245,34             | 2,16E+05               | 1,41E+06              | 6,54           | 5,90E-06         | gi 121896029        |
| Cellular metabolism | Carbohydrate metabolic process                                                         | Malate dehydrogenase, putative [ <i>Trichomonas vaginalis</i> G3] (21)                                              | 3 (3)                              | 156,4              | 1,55E+05               | 5,36E+05              | 3,46           | 2,12E-05         | gi 121915536        |
| Cellular metabolism | <a href="#">Carbohydrate metabolic process</a><br><a href="#">Energetic metabolism</a> | Starch binding domain containing protein [ <i>Trichomonas vaginalis</i> G3] (22)                                    | 3 (3)                              | 79,81              | 1,98E+04               | 1,33E+05              | 6,73           | 8,92E-04         | gi 121903627        |

(Continued)

Table 3. (Continued)

| Category            | Predicted Functions                                                                                                                         | Description (cn) <sup>1</sup>                                                                      | P <sup>2</sup><br>(n) <sup>3</sup> | Score <sup>4</sup> | Clone<br>P178-13<br>C7 | Clone<br>R17-12<br>C1 | Fold<br>Change | ANOVA p<br>Value | Accession<br>Number |
|---------------------|---------------------------------------------------------------------------------------------------------------------------------------------|----------------------------------------------------------------------------------------------------|------------------------------------|--------------------|------------------------|-----------------------|----------------|------------------|---------------------|
| Cellular metabolism | Carbohydrate metabolic process<br>Energetic metabolism                                                                                      | 4-alpha-glucanotransferase family protein [ <i>Trichomonas vaginalis</i> G3] (23)                  | 10<br>(10)                         | 425,98             | 4,24E+04               | 1,30E+05              | 3,07           | 6,46E-07         | gi 121895827        |
| Cellular metabolism | Carbohydrate metabolic process<br>Transferase-kinase                                                                                        | pyruvate, phosphate dikinase family protein [ <i>Trichomonas vaginalis</i> G3] (24)                | 9 (9)                              | 562,62             | 1,32E+04               | 9,12E+04              | 6,9            | 1,36E-08         | gi 121904065        |
| Cellular metabolism | Carbohydrate metabolic process<br>Glycolysis<br>Transferase-kinase                                                                          | PEP-utilizing enzyme, TIM barrel domain containing protein [ <i>Trichomonas vaginalis</i> G3] (25) | 2 (2)                              | 74,26              | 1978,28                | 2,01E+04              | 10,16          | 1,22E-03         | gi 121914977        |
| Cellular metabolism | Carbohydrate metabolic process<br>Glycolysis                                                                                                | enolase 4, putative [ <i>Trichomonas vaginalis</i> G3] (26)                                        | 3 (2)                              | 88,69              | 5589,54                | 2,28E+04              | 4,07           | 4,60E-06         | gi 121908406        |
| Cellular metabolism | Nucleobase-containing compound metabolic process<br>Glycogen metabolic process<br>Response to stress<br>Transcription<br>Metallophosphatase | phosphatase, putative [ <i>Trichomonas vaginalis</i> G3] (27)                                      | 3 (3)                              | 110,32             | 6005,06                | 2,02E+04              | 3,37           | 2,59E-08         | gi 121888987        |
| Cellular metabolism | Energetic metabolism<br>Nucleobase-containing compound metabolic process                                                                    | Phosphorylase family protein [ <i>Trichomonas vaginalis</i> G3] (28)                               | 3 (3)                              | 94,45              | 9127,21                | 2,96E+04              | 3,24           | 1,04E-04         | gi 121891200        |
| Cellular metabolism | Peptidase                                                                                                                                   | Clan SB, family S8, subtilisin-like serine peptidase [ <i>Trichomonas vaginalis</i> G3] (29)       | 2 (2)                              | 47,09              | 1,63E+04               | 9,69E+04              | 5,93           | 3,44E-04         | gi 121885232        |
| Cellular metabolism | Peptidase<br>Cysteine protease<br>Calmodulin                                                                                                | Clan CA, family C2, calpain-like cysteine peptidase [ <i>Trichomonas vaginalis</i> G3] (30)        | 3 (3)                              | 44,02              | 3,07E+04               | 1,50E+05              | 4,88           | 3,37E-04         | gi 121907418        |
| Cellular metabolism | Oxidoreductase-peroxidase<br>Response to stress                                                                                             | hybrid-cluster protein, putative [ <i>Trichomonas vaginalis</i> G3] (31)                           | 2 (2)                              | 32,17              | 1467,22                | 2,69E+04              | 18,33          | 8,26E-06         | gi 121908608        |
| Cellular metabolism | Protein metabolism<br>Response to stress<br>Chaperone                                                                                       | DnaJ domain containing protein [ <i>Trichomonas vaginalis</i> G3] (32)                             | 2 (2)                              | 61,26              | 2597,33                | 2,66E+04              | 10,22          | 6,84E-05         | gi 121911862        |
| Cellular metabolism | Protein synthesis<br>Transcription factor                                                                                                   | NAC domain containing protein [ <i>Trichomonas vaginalis</i> G3] (33)                              | 2 (2)                              | 125,14             | 2206,15                | 6,49E+04              | 29,42          | 2,64E-06         | gi 121897587        |
| Cellular metabolism | Protein synthesis<br>Translation                                                                                                            | ribosomal protein L10a [ <i>Trichomonas vaginalis</i> ] (34)                                       | 2 (2)                              | 136,77             | 4,43E+04               | 2,00E+05              | 4,52           | 2,10E-04         | gi 4193363          |
| Cellular metabolism | Protein synthesis                                                                                                                           | elongation factor 1 alpha, partial [ <i>Trichomonas vaginalis</i> ] (35)                           | 11<br>(11)                         | 526,1              | 4,75E+05               | 1,44E+06              | 3,02           | 9,55E-05         | gi 329750813        |
| Cellular metabolism | Protein-protein interaction<br>Ribosyltransferase                                                                                           | B-box zinc finger family protein [ <i>Trichomonas vaginalis</i> G3] (36)                           | 2 (2)                              | 30,34              | 1,00E+04               | 5,62E+04              | 5,61           | 4,39E-09         | gi 121906335        |
| Cellular metabolism | Protein-protein interaction                                                                                                                 | erythrocyte binding protein, putative [ <i>Trichomonas vaginalis</i> G3] (37)                      | 4 (4)                              | 181,54             | 2,41E+04               | 1,26E+05              | 5,22           | 1,63E-08         | gi 121898736        |
| DNA replication     | DNA replication                                                                                                                             | XRN 5'-3' exonuclease N-terminus family protein [ <i>Trichomonas vaginalis</i> G3] (38)            | 2 (2)                              | 38,94              | 3998,07                | 2,45E+04              | 6,13           | 2,43E-04         | gi 121913977        |
| DNA replication     | DNA replication<br>DNA recombination and DNA repair<br>Response to stress                                                                   | ATP-dependent DNA helicase, RecQ family protein [ <i>Trichomonas vaginalis</i> G3] (39)            | 2 (2)                              | 34,18              | 1,04E+04               | 3,74E+04              | 3,59           | 2,96E-04         | gi 121909374        |
| DNA replication     | Nucleus regulation<br>Chromatin replication                                                                                                 | SNF2 family N-terminal domain containing protein [ <i>Trichomonas vaginalis</i> G3] (40)           | 2 (2)                              | 28,25              | 1,23E+05               | 9,67E+05              | 7,86           | 1,25E-05         | gi 121903240        |
| Cellular component  | Translation                                                                                                                                 | SRP54-type protein, putative [ <i>Trichomonas vaginalis</i> G3] (41)                               | 4 (4)                              | 103,41             | 3,00E+04               | 1,48E+05              | 4,91           | 3,56E-03         | gi 121902866        |

(Continued)



Table 3. (Continued)

| Category    | Predicted Functions | Description (cn) <sup>1</sup>                                                               | P <sup>2</sup><br>(n) <sup>3</sup> | Score <sup>4</sup> | Clone<br>P178-13<br>C7 | Clone<br>R17-12<br>C1 | Fold<br>Change | ANOVA p<br>Value | Accession<br>Number |
|-------------|---------------------|---------------------------------------------------------------------------------------------|------------------------------------|--------------------|------------------------|-----------------------|----------------|------------------|---------------------|
| Translation | Translation         | eukaryotic release factor 3 GTPase subunit [ <i>Trichomonas vaginalis</i> ] (42)            | 3 (3)                              | 116,13             | 3470,55                | 1,83E+04              | 5,27           | 7,97E-04         | gi 8307949          |
| Translation | Translation         | translation initiation factor eIF-5A family protein [ <i>Trichomonas vaginalis</i> G3] (43) | 2 (2)                              | 108,14             | 6,24E+04               | 2,49E+05              | 3,99           | 2,43E-05         | gi 121876621        |

Identified and relatively quantified proteins from membrane proteins enriched fraction for *T. gallinae* clonal cultures more abundant in clone R17-12 C1. Proteins were grouped by category, protein function and fold change. Only proteins with 2 or more identified peptides,  $\geq 3$  fold change and statistical significance (ANOVA,  $p$ -value  $< 0.01$ ) are listed.

<sup>1</sup> cn: cytoscape reference number in Fig 4.

<sup>2</sup> P: number of identified peptides.

<sup>3</sup> (n): number of unique, non-conflicting peptides.

<sup>4</sup> total protein score (sum of individual peptides scores).

<https://doi.org/10.1371/journal.pone.0224032.t003>

in membrane trafficking, the C2 domain containing protein and Vps52 / Sac2 family protein, and other three proteins take part in vesicle-mediated transport (endocytosis and exocytosis): putative SNARE protein, CMGC family protein kinase and SacI homology domain containing protein. It is also important to mention the presence of two putative malate dehydrogenases, which are related to the carbohydrate metabolic process and are also suggested to be virulence factors [18, 23]. Finally, there are proteins involved in carbohydrate and metabolic processes, DNA replication and translation that were more abundant in clone R17-12 C1.

In the clone with the lowest initial virulence (P178-13 C7), proteins associated with stress response, such as HSP 70 and HSP 90, were identified (Table 4 and Fig 6). Only two of the proteins were related to the cytoskeleton: putative profilin and putative alpha-actinin. Two of the proteins which were found more abundant in this clone participate in signal transduction: the putative small GTP-binding protein and GTPase-activator protein. Another group of identified proteins was associated with vesicle-mediated transport (endocytosis and exocytosis) and transmembrane transport: GDP dissociation inhibitor family protein, Dynamin central region family protein, Clathrin and VSP domain-containing protein, ABC transporter family protein, hydrogenosomal carrier protein and phospholipid-translocating P-type ATPase, flippase family protein. A large group of proteins that were also more abundant in the clone with the lowest initial virulence score were related to cellular metabolism, more precisely carbohydrate metabolism. Among them, lactate dehydrogenase family protein, glucose-6-phosphate 1-dehydrogenase family protein, glucose-6-phosphate isomerase family protein, galactokinase family protein, alpha amylase, catalytic domain containing protein, glycosyl transferase group 1 family protein, 6-phosphogluconate dehydrogenase decarboxylating family protein and putative fructose 1,6-bisphosphate aldolase, can be mentioned. Also, the cysteine peptidase Clan CA, family C1, cathepsin L-like and the metalloprotease Clan MH, family M20, peptidase T-like were more abundant in this clone. Finally, a group of proteins implied in protein metabolic processes, DNA replication, translation and translocation were also identified as more abundant in clone P178-13 C7.

## Discussion

Considering that mixed infections have been detected during the natural course of the *T. gallinae* infection, the use of clonal cultures, established by micromanipulation, guarantees genetic

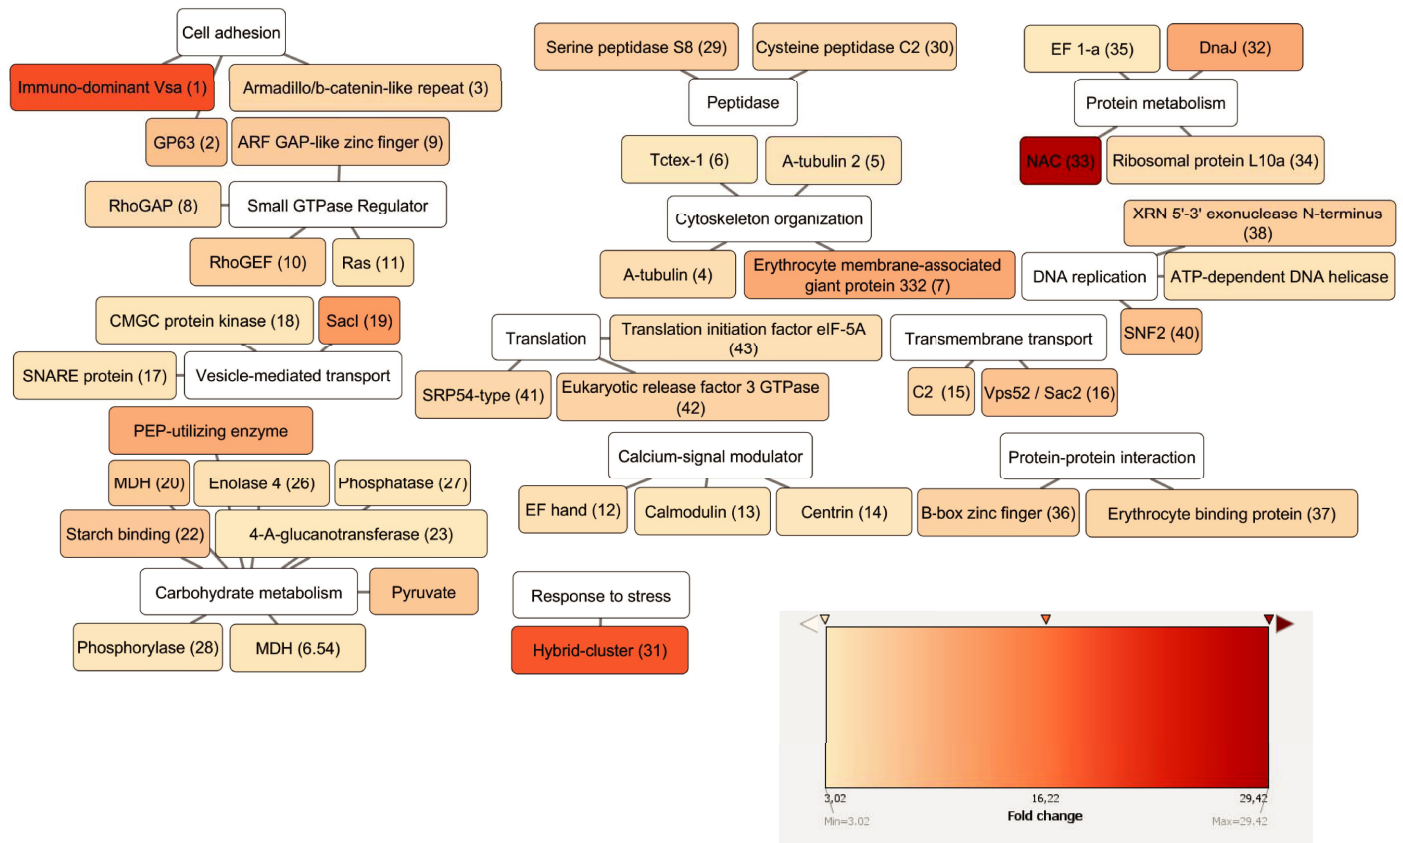

**Fig 5. Proteins more abundant in R17.** Proteins more abundant in clone R17-12 C1. Cytoscape free software was used to represent the proteins connected with their main predicted functions. The colours were based on the n-fold abundance data in the clone with the highest initial virulence compared with the other clone. For explanation of the abbreviated protein names see cytoscape reference numbers on Table 3.

<https://doi.org/10.1371/journal.pone.0224032.g005>

homogeneity of the investigated parasite [3, 4, 6, 9, 11]. This is crucial in order to perform detailed studies on the parasite’s biology, especially the proteome.

The employment of cell cultures to determine the pathogenicity of *T. gallinae* isolates offers an *in vitro* approach in addition to animal trials. Some of the variables that can interfere with the results, such as the individual immune response of the animals, are not influencing the *in vitro* system and can therefore easier be standardized as well as better controlled in its variability. Differences in virulence between the clones were detected at 24 and 48 hours post-infection and were associated with the parasite genotype. Amin et al. [14] also observed variation in the CPE score of the *T. gallinae* clones employed in their study, in which one clone of genotypic group ITS-OBT-Tg-1 caused complete cell monolayer destruction whilst a ITS-OBT-Tg-2 clone induced only 50% of destruction. These results are in agreement with the observations from natural infections in some studies carried out in Europe [6, 11–13].

The membrane proteins enriched fraction of the parasite was selected for further proteomic characterization due to the potential role of the membrane proteins in the process of adhesion to host cells and signal trafficking. The adhesion is important to maintain the colonization of virulent protozoa, but also of less virulent ones. The role of membranes proteins in the establishment of infection has already been demonstrated with other protozoa, such as *Giardia duodenalis* and *Entamoeba histolytica* [31, 32]. Some of the identified and quantified proteins,

Table 4. Proteins more abundant in P178.

| Category            | Predicted Functions                                                                                                | Description (cn) <sup>1</sup>                                                                             | P <sup>2</sup> (n) <sup>3</sup> | Score <sup>4</sup> | Clone P178-13 C7 | Clone R17-12 C1 | Fold Change | ANOVA p Value | Accession Number |
|---------------------|--------------------------------------------------------------------------------------------------------------------|-----------------------------------------------------------------------------------------------------------|---------------------------------|--------------------|------------------|-----------------|-------------|---------------|------------------|
| Cellular component  | Cytoskeleton                                                                                                       | profilin, putative [ <i>Trichomonas vaginalis</i> G3] (1)                                                 | 2 (2)                           | 64,27              | 6,67E+04         | 1,40E+04        | 4,75        | 2,17E-05      | gi 121906940     |
| Cellular component  | Cytoskeleton<br>Metal ion binding                                                                                  | putative alpha-actinin [ <i>Histomonas meleagridis</i> ] (2)                                              | 3 (3)                           | 48,12              | 7720,57          | 1239            | 6,23        | 2,59E-03      | gi 262358541     |
| Signal transduction | Signal transduction                                                                                                | small GTP-binding protein, putative [ <i>Trichomonas vaginalis</i> G3] (3)                                | 2 (2)                           | 237,3              | 3,06E+05         | 7,28E+04        | 4,21        | 1,97E-03      | gi 121880468     |
| Signal transduction | Signal transduction                                                                                                | GTPase-activator protein, putative [ <i>Trichomonas vaginalis</i> G3] (4)                                 | 2 (2)                           | 29,36              | 2,40E+05         | 6,07E+04        | 3,95        | 3,09E-04      | gi 121892626     |
| Cellular metabolism | Response to stress                                                                                                 | Heat shock 70 kDa protein, mitochondrial precursor, putative [ <i>Trichomonas vaginalis</i> G3] (5)       | 2 (2)                           | 74,39              | 2,02E+05         | 2,48E+04        | 8,13        | 1,66E-03      | gi 121914923     |
| Cellular metabolism | Response to stress                                                                                                 | Hsp90 protein [ <i>Trichomonas vaginalis</i> G3] (6)                                                      | 6 (6)                           | 326,25             | 3,83E+04         | 1,19E+04        | 3,22        | 1,97E-05      | gi 121917639     |
| Cellular metabolism | Oxidation-reduction homeostasis<br>Vesicle-mediated transport<br>Small GTPase regulator (-)<br>Signal transduction | GDP dissociation inhibitor family protein [ <i>Trichomonas vaginalis</i> G3] (7)                          | 6 (6)                           | 355,73             | 1,37E+05         | 3,96E+04        | 3,46        | 4,89E-05      | gi 121879717     |
| Endocytosis         | Vesicle-mediated transport<br>Cytoskeleton<br>Small GTPase                                                         | Dynamin central region family protein [ <i>Trichomonas vaginalis</i> G3] (8)                              | 3 (3)                           | 64,69              | 5,79E+04         | 7821,44         | 7,4         | 5,98E-05      | gi 121887114     |
| Exocytosis          | Vesicle-mediated transport                                                                                         | Clathrin and VPS domain-containing protein, partial [ <i>Trichomonas vaginalis</i> G3] (9)                | 8 (8)                           | 349,57             | 1,08E+05         | 1,51E+04        | 7,17        | 1,06E-04      | gi 121873597     |
| Exocytosis          | Vesicle-mediated transport                                                                                         | Clathrin and VPS domain-containing protein [ <i>Trichomonas vaginalis</i> G3] (10)                        | 6 (6)                           | 208,37             | 1,46E+05         | 2,06E+04        | 7,11        | 2,48E-05      | gi 121898439     |
| Cellular metabolism | Transmembrane transport                                                                                            | ABC transporter family protein [ <i>Trichomonas vaginalis</i> G3] (11)                                    | 4 (4)                           | 149,49             | 2,76E+04         | 5066,61         | 5,45        | 3,12E-07      | gi 121883001     |
| Cellular metabolism | Transmembrane transport                                                                                            | ABC transporter family protein [ <i>Trichomonas vaginalis</i> G3] (12)                                    | 3 (3)                           | 99,04              | 3,27E+04         | 7707,22         | 4,24        | 7,94E-05      | gi 121889755     |
| Cellular metabolism | Transmembrane transport                                                                                            | hydrogenosomal carrier protein, partial [ <i>Trichomonas gallinae</i> ] (13)                              | 14 (14)                         | 744,55             | 2,07E+06         | 5,02E+05        | 4,12        | 5,36E-04      | gi 30315255      |
| Cellular metabolism | Transmembrane transport                                                                                            | phospholipid-translocating P-type ATPase, flippase family protein [ <i>Trichomonas vaginalis</i> G3] (14) | 2 (2)                           | 49,93              | 1,47E+05         | 3,84E+04        | 3,81        | 1,56E-05      | gi 121897029     |
| Cellular metabolism | Carbohydrate metabolic process<br>Energetic metabolism                                                             | lactate dehydrogenase family protein [ <i>Trichomonas vaginalis</i> G3] (15)                              | 2 (2)                           | 43,1               | 1,21E+05         | 5473,69         | 22,13       | 3,85E-07      | gi 121889193     |
| Cellular metabolism | Carbohydrate metabolic process<br>Energetic metabolism                                                             | glucose-6-phosphate 1-dehydrogenase family protein [ <i>Trichomonas vaginalis</i> G3] (16)                | 7 (7)                           | 285,86             | 8,47E+04         | 1,21E+04        | 7           | 2,95E-07      | gi 121883413     |
| Cellular metabolism | Carbohydrate metabolic process<br>Gluconeogenesis<br>Glycolysis                                                    | glucose-6-phosphate isomerase family protein [ <i>Trichomonas vaginalis</i> G3] (17)                      | 17 (17)                         | 917,8              | 2,76E+05         | 5,44E+04        | 5,08        | 1,37E-04      | gi 121906378     |
| Cellular metabolism | Carbohydrate metabolic process<br>Energetic metabolism                                                             | glucose-6-phosphate isomerase family protein [ <i>Trichomonas vaginalis</i> G3] (18)                      | 3 (3)                           | 89,42              | 7,67E+04         | 1,71E+04        | 4,49        | 1,22E-06      | gi 121908707     |
| Cellular metabolism | Carbohydrate metabolic process<br>Energetic metabolism                                                             | galactokinase family protein [ <i>Trichomonas vaginalis</i> G3] (19)                                      | 3 (3)                           | 134,69             | 2,73E+04         | 6100,32         | 4,47        | 3,28E-07      | gi 121903545     |

(Continued)

Table 4. (Continued)

| Category            | Predicted Functions                                          | Description (cn) <sup>1</sup>                                                                            | P <sup>2</sup> (n) <sup>3</sup> | Score <sup>4</sup> | Clone P178-13 C7 | Clone R17-12 C1 | Fold Change | ANOVA p Value | Accession Number |
|---------------------|--------------------------------------------------------------|----------------------------------------------------------------------------------------------------------|---------------------------------|--------------------|------------------|-----------------|-------------|---------------|------------------|
| Cellular metabolism | Carbohydrate metabolic process<br>Energetic metabolism       | Alpha amylase, catalytic domain containing protein [ <i>Trichomonas vaginalis</i> G3] (20)               | 2 (2)                           | 94,07              | 1,35E+04         | 3431,11         | 3,94        | 9,70E-04      | gi 121915021     |
| Cellular metabolism | Carbohydrate metabolic process<br>Energetic metabolism       | glycosyl transferase, group 1 family protein [ <i>Trichomonas vaginalis</i> G3] (21)                     | 2 (2)                           | 43,52              | 2,36E+04         | 6251,76         | 3,78        | 5,41E-05      | gi 121889369     |
| Cellular metabolism | Carbohydrate metabolic process<br>Energetic metabolism       | 6-phosphogluconate dehydrogenase, decarboxylating family protein [ <i>Trichomonas vaginalis</i> G3] (22) | 2 (2)                           | 99,56              | 1,10E+05         | 3,03E+04        | 3,64        | 6,83E-06      | gi 121896682     |
| Cellular metabolism | Carbohydrate metabolic process<br>Metal ion binding<br>Lyase | fructose-1,6-bisphosphate aldolase, putative [ <i>Trichomonas vaginalis</i> G3] (23)                     | 12 (12)                         | 714,5              | 1,64E+06         | 5,03E+05        | 3,26        | 2,12E-03      | gi 121909882     |
| Cellular metabolism | Protein metabolism<br>cysteine peptidase                     | Clan CA, family C1, cathepsin L-like cysteine peptidase [ <i>Trichomonas vaginalis</i> G3] (24)          | 2 (2)                           | 43,69              | 2,27E+04         | 4950,94         | 4,59        | 3,18E-03      | gi 121908100     |
| Cellular metabolism | Protein metabolism<br>Peptidase                              | Clan CA, family C1, cathepsin L-like cysteine peptidase, partial [ <i>Trichomonas gallinae</i> ] (25)    | 6 (6)                           | 286,99             | 1,28E+06         | 3,49E+05        | 3,67        | 1,69E-03      | gi 386364444     |
| Cellular metabolism | Protein metabolism<br>metalloprotease                        | Clan MH, family M20, peptidase T-like metalloprotease [ <i>Trichomonas vaginalis</i> G3] (26)            | 3 (3)                           | 123,12             | 1,34E+05         | 2,97E+04        | 4,49        | 1,24E-04      | gi 121901617     |
| Cellular metabolism | Protein metabolism<br>threonine peptidase                    | Family T1, proteasome beta subunit, threonine peptidase [ <i>Trichomonas vaginalis</i> G3] (27)          | 3 (3)                           | 94,65              | 3,75E+04         | 1,24E+04        | 3,03        | 1,47E-04      | gi 121916758     |
| Cellular metabolism | Protein metabolism<br>protein kinases                        | CAMK family protein kinase [ <i>Trichomonas vaginalis</i> G3] (28)                                       | 2 (2)                           | 31,32              | 8977,61          | 715,69          | 12,54       | 5,04E-03      | gi 121906466     |
| Cellular metabolism | Protein metabolism<br>protein kinases                        | CAMK family protein kinase [ <i>Trichomonas vaginalis</i> G3] (29)                                       | 2 (2)                           | 32,25              | 1,62E+04         | 1619,25         | 9,98        | 1,01E-03      | gi 121912207     |
| Cellular metabolism | Protein metabolism<br>Protein kinase<br>Signal transduction  | AGC family protein kinase [ <i>Trichomonas vaginalis</i> G3] (30)                                        | 2 (2)                           | 54,75              | 1,69E+05         | 3,65E+04        | 4,63        | 9,97E-03      | gi 121890243     |
| Cellular metabolism | Metal ion binding<br>Oxidation-reduction<br>homeostasis      | putative NADPH-dependent butanol dehydrogenase [ <i>Trichomonas vaginalis</i> ] (31)                     | 2 (2)                           | 206,35             | 4,42E+04         | 2102,87         | 21,01       | 2,18E-05      | gi 4426910       |
| Cellular metabolism | Metal ion binding<br>Oxidation-reduction<br>homeostasis      | Pyridine nucleotide-disulphide oxidoreductase family protein [ <i>Trichomonas vaginalis</i> G3] (32)     | 3 (3)                           | 178,07             | 2,07E+05         | 3,00E+04        | 6,9         | 9,64E-08      | gi 121898098     |
| Cellular metabolism | Oxidation-reduction<br>homeostasis                           | thioredoxin-disulfide reductase family protein [ <i>Trichomonas vaginalis</i> G3] (33)                   | 2 (2)                           | 113,87             | 1,21E+05         | 2,93E+04        | 4,14        | 1,62E-03      | gi 121893127     |
| Cellular metabolism | Protein metabolism                                           | Glutamine synthetase, catalytic domain containing protein [ <i>Trichomonas vaginalis</i> G3] (34)        | 3 (3)                           | 107,13             | 7,43E+04         | 9390,65         | 7,91        | 1,67E-08      | gi 121892813     |
| Cellular metabolism | Protein metabolism                                           | aminotransferase, classes I and II family protein [ <i>Trichomonas vaginalis</i> G3] (35)                | 2 (2)                           | 164,19             | 1,55E+05         | 4,54E+04        | 3,41        | 3,92E-05      | gi 121909674     |
| Cellular metabolism | Protein metabolism                                           | Copine family protein [ <i>Trichomonas vaginalis</i> G3] (36)                                            | 3 (3)                           | 53,44              | 6,76E+04         | 2,14E+04        | 3,16        | 2,31E-03      | gi 121901567     |
| Cellular metabolism | Protein metabolism                                           | co-chaperone Hsc20 family protein [ <i>Trichomonas vaginalis</i> G3] (37)                                | 2 (2)                           | 70,46              | 3,19E+04         | 1,03E+04        | 3,11        | 0,01          | gi 121889907     |
| Cellular metabolism | Protein metabolism<br>Phospholipid metabolic<br>process      | glycosyl transferase, group 2 family protein [ <i>Trichomonas vaginalis</i> G3] (38)                     | 4 (4)                           | 195,85             | 2,82E+04         | 4751,28         | 5,94        | 1,67E-05      | gi 121911637     |

(Continued)

Table 4. (Continued)

| Category            | Predicted Functions                                                                                                            | Description (cn) <sup>1</sup>                                                                                            | P <sup>2</sup><br>(n) <sup>3</sup> | Score <sup>4</sup> | Clone<br>P178-13<br>C7 | Clone<br>R17-12<br>C1 | Fold<br>Change | ANOVA p<br>Value | Accession<br>Number |
|---------------------|--------------------------------------------------------------------------------------------------------------------------------|--------------------------------------------------------------------------------------------------------------------------|------------------------------------|--------------------|------------------------|-----------------------|----------------|------------------|---------------------|
| Cellular metabolism | Energetic metabolism<br>Protein glycosylation                                                                                  | Oligosaccharyl transferase STT3 subunit family protein [ <i>Trichomonas vaginalis</i> G3] (39)                           | 2 (2)                              | 63,86              | 1,33E+04               | 323,32                | 41,08          | 7,69E-08         | gi 121902670        |
| Cellular metabolism | Glycogen metabolic process<br>Transferase                                                                                      | UTP-glucose-1-phosphate uridylyltransferase family protein [ <i>Trichomonas vaginalis</i> G3] (40)                       | 5 (5)                              | 168,95             | 2,17E+04               | 6092,98               | 3,56           | 2,44E-06         | gi 121904554        |
| Cellular metabolism | Translation<br>Transmembrane transport<br>Calmodulin<br>Ribosomal protein<br>Mitochondrial carrier protein                     | Mitochondrial carrier protein [ <i>Trichomonas vaginalis</i> G3] (41)                                                    | 9 (9)                              | 479,27             | 6,94E+05               | 1,77E+05              | 3,92           | 4,36E-04         | gi 121889868        |
| Cellular component  | Ribosomal protein<br>RNA metabolic process<br>Protein metabolic processes                                                      | 40S ribosomal protein S16, putative [ <i>Trichomonas vaginalis</i> G3] (42)                                              | 2 (2)                              | 143,1              | 5,03E+04               | 1,45E+04              | 3,47           | 7,03E-04         | gi 121885138        |
| Cellular metabolism | Energetic metabolism<br>Protein complex assembly<br>HSP70/actin superfamily                                                    | dnaK protein [ <i>Trichomonas vaginalis</i> G3] (43)                                                                     | 4 (4)                              | 101,55             | 1,64E+05               | 1,84E+04              | 8,93           | 5,84E-08         | gi 121907663        |
| Cellular metabolism | Transaldolase                                                                                                                  | Transaldolase A, putative [ <i>Trichomonas vaginalis</i> G3] (44)                                                        | 2 (2)                              | 62,98              | 2,40E+04               | 4347,89               | 5,52           | 8,56E-05         | gi 121896456        |
| Cellular metabolism | Transaminase<br>Cellular aminoacid metabolic process                                                                           | aminotransferase, classes I and II family protein [ <i>Trichomonas vaginalis</i> G3] (45)                                | 3 (3)                              | 158,74             | 1,17E+05               | 2,72E+04              | 4,3            | 9,78E-03         | gi 121901152        |
| Cellular metabolism | Transcription                                                                                                                  | RNA polymerase II largest subunit, partial [ <i>Trichomonas gallinae</i> ] (46)                                          | 2 (2)                              | 87,66              | 8257,66                | 1452,08               | 5,69           | 2,60E-04         | gi 327242119        |
| Cellular metabolism | Transcription                                                                                                                  | histone H4-3 [ <i>Trichomonas vaginalis</i> G3] (47)                                                                     | 2 (2)                              | 184,78             | 2,99E+05               | 9,01E+04              | 3,32           | 3,19E-03         | gi 121889898        |
| Cellular component  | Hydrogenase, metal ion binding                                                                                                 | hydrogenosomal Fe-hydrogenase, partial [ <i>Trichomonas gallinae</i> ] (48)                                              | 10 (10)                            | 704,23             | 2,57E+05               | 7,19E+04              | 3,58           | 8,81E-03         | gi 507310429        |
| Cellular metabolism | Energetic metabolism<br>Nucleobase containing compound metabolic process<br>Signal transduction                                | 3'5'-cyclic nucleotide phosphodiesterase family protein [ <i>Trichomonas vaginalis</i> G3] (49)                          | 3 (3)                              | 60,29              | 4,57E+05               | 1,29E+05              | 3,54           | 7,28E-04         | gi 121889147        |
| Cellular metabolism | ATPase<br>Calcium signal modulators<br>Nucleobase-containing compound metabolic process<br>Transmembrane calcium ion transport | calcium-translocating P-type ATPase, PMCA-type family protein [ <i>Trichomonas vaginalis</i> G3] (50)                    | 2 (2)                              | 71,75              | 5,25E+04               | 8685,17               | 6,04           | 2,13E-05         | gi 121889617        |
| Cellular metabolism | ATPase                                                                                                                         | ATPase, AAA family protein [ <i>Trichomonas vaginalis</i> G3] (51)                                                       | 2 (2)                              | 30,29              | 5,54E+05               | 3,85E+04              | 14,38          | 1,45E-06         | gi 121886218        |
| Cellular metabolism | Metal ion binding<br>Transferase                                                                                               | Phosphoglucomutase/ phosphomannomutase, alpha/beta/alpha domain I family protein [ <i>Trichomonas vaginalis</i> G3] (52) | 8 (8)                              | 414,71             | 2,67E+05               | 7,70E+04              | 3,47           | 3,13E-05         | gi 121885206        |
| Cellular metabolism | DNA replication<br>Energetic metabolism                                                                                        | ATP-dependent DNA helicase, RecQ family protein [ <i>Trichomonas vaginalis</i> G3] (53)                                  | 3 (2)                              | 54,81              | 2,05E+05               | 6,37E+04              | 3,22           | 2,82E-03         | gi 121888663        |
| DNA replication     | DNA replication                                                                                                                | polymerase zeta subunit, putative [ <i>Trichomonas vaginalis</i> G3] (54)                                                | 2 (2)                              | 36,13              | 2,96E+04               | 6239,31               | 4,74           | 1,58E-06         | gi 121909895        |

(Continued)

Table 4. (Continued)

| Category        | Predicted Functions              | Description (cn) <sup>1</sup>                                                                         | P <sup>2</sup><br>(n) <sup>3</sup> | Score <sup>4</sup> | Clone<br>P178-13<br>C7 | Clone<br>R17-12<br>C1 | Fold<br>Change | ANOVA p<br>Value | Accession<br>Number |
|-----------------|----------------------------------|-------------------------------------------------------------------------------------------------------|------------------------------------|--------------------|------------------------|-----------------------|----------------|------------------|---------------------|
| DNA replication | DNA replication                  | helicase, putative [ <i>Trichomonas vaginalis</i> G3] (55)                                            | 2 (2)                              | 36,9               | 4,43E+04               | 9427,08               | 4,7            | 2,77E-07         | gi 121911876        |
| DNA replication | DNA replication<br>Transcription | possible regulator of nonsense transcripts, putative [ <i>Trichomonas vaginalis</i> G3] (56)          | 3 (3)                              | 81,75              | 4,87E+05               | 3,46E+04              | 14,09          | 7,25E-07         | gi 121916893        |
| DNA replication | DNA replication<br>Transcription | Ribonucleotide reductase, all-alpha domain containing protein [ <i>Trichomonas vaginalis</i> G3] (57) | 5 (5)                              | 255,06             | 1,61E+05               | 3,94E+04              | 4,09           | 2,53E-04         | gi 121915211        |
| DNA replication | Nucleotide binding               | heavy neurofilament protein, putative [ <i>Trichomonas vaginalis</i> G3] (58)                         | 3 (3)                              | 46,16              | 1,54E+04               | 4756,37               | 3,23           | 5,43E-05         | gi 121898592        |
| Translation     | RNA metabolic process            | Type III restriction enzyme, res subunit family protein [ <i>Trichomonas vaginalis</i> G3] (59)       | 2 (2)                              | 46,03              | 7,36E+05               | 2,01E+05              | 3,66           | 8,63E-03         | gi 121898850        |
| Translation     | Metal ion binding                | alanyl-tRNA synthetase, partial [ <i>Trichomonas vaginalis</i> ] (60)                                 | 5 (5)                              | 187,01             | 1,31E+05               | 1,71E+04              | 7,63           | 8,44E-06         | gi 51102334         |

Identified and relatively quantified proteins from membrane proteins enriched fraction for *T. gallinae* clonal cultures more abundant in clone P178-13 C7. Proteins were grouped by category, protein function and fold change. Only proteins with 2 or more identified peptides, ≥ 3 fold change and statistical significance (ANOVA, *p*-value < 0.01) are listed.

<sup>1</sup> cn: cytoscape reference number in Fig 5

<sup>2</sup> P: number of identified peptides.

<sup>3</sup> (n): number of unique, non-conflicting peptides.

<sup>4</sup> total protein score (sum of individual peptides scores).

<https://doi.org/10.1371/journal.pone.0224032.t004>

such as enolase, have been also identified as moonlighting proteins with double functions in other protozoa, like *Toxoplasma*, *Trypanosoma* or *Trichomonas* spp. and for that reason they could have been found in different subcellular locations [33]. Vesicular trafficking is extensive in the membrane system, favoring the translocation of proteins along the cell compartments.

Among the proteins that differed in abundance, a large amount of proteins with no assigned function was revealed. This result was expected, as many of the membranes proteins are specific for each microorganism and are possibly implicated in host-parasite species-specific interactions [19].

Colonization of the host is a first step necessary for either commensal or pathogenic microorganisms [34]. In this sense, the identification of peptides from different surface proteins of the Leucine Rich Repeat family proteins and surface antigen BspA-like, with different abundance in both clones, might be related to the colonization of the mucosa and the establishment of a chronic infection, but not necessarily with virulence. These proteins are commonly present in a broad range of organisms, including all three domains of life (Eukaryota, Archae and Bacteria), all of them residing on mucosal surfaces or body cavities [17].

Some proteases or other molecules involved in cell adhesion, like the immuno-dominant variable surface antigen-like or the GP63-like, which are considerably more abundant in the clone with the highest initial virulence score (18.96 and 7.78 fold change, respectively), have been suggested as virulence factors in other protozoa, like *T. vaginalis* and *Leishmania* sp.. They act by binding and degrading various host components [17, 22]. In *T. vaginalis* a protein of the GP63-like group was determined to be involved in the virulence on HeLa cells [20]. The presence of the armadillo/beta-catenin-like repeat family protein in a higher amount in the clone with the highest initial virulence score also indicates that these cell adhesion molecules could be important in the pathogenesis of avian trichomonosis. Eukaryotic armadillo repeat

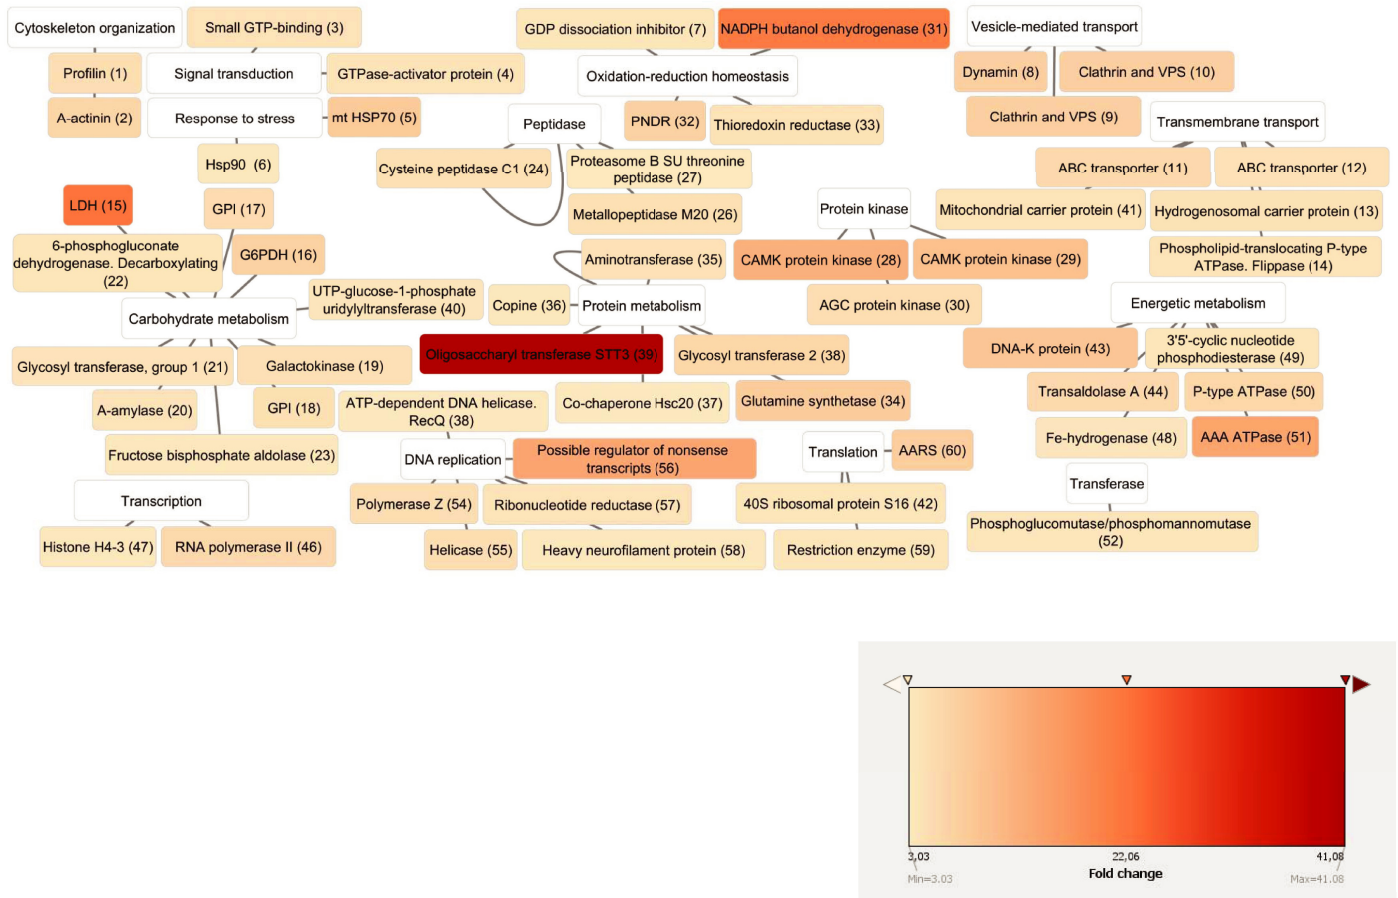

**Fig 6. Proteins more abundant in P178.** Proteins more abundant in clone P178-13 C7. Cytoscape free software was used to represent the proteins connected with their main predicted functions. The colours were based on the n-fold abundance data in the clone with the lowest initial virulence compared with the other clone. For explanation of the abbreviated protein names see cytoscape reference number on Table 4.

<https://doi.org/10.1371/journal.pone.0224032.g006>

proteins (beta-catenin-like molecules) usually play a role in cell-to-cell adhesion and cytoskeletal regulation together with intracellular signaling. They have been identified in some apicomplexan parasites, probably acting during the invasion process [35]. Malate dehydrogenase has been found more abundant in the clone with the highest initial virulence score and it could be a virulence factor since large amounts of malate dehydrogenase were found in amoeboid trophozoites of *T. vaginalis* bound to fibronectin, suggesting the relationship with the adherence of the parasite to the host cells [23]. Some forms of the malate dehydrogenase were also exclusively expressed in a fresh clinical isolate of *T. vaginalis*, (high virulence) in comparison with a long-term culture (low virulence) [18].

Although several proteases have been identified as more abundant in one or the other clone, a Clan SB family S8 subtilisin-like serine peptidase has been identified as more abundant in the clone with the highest initial virulence score. This protease has been found in higher amounts in adherent isolates of the closely related protozoan *T. vaginalis* [19]. Clan CA family C2 calpain-like cysteine peptidase, which is more abundant in the clone with the highest initial virulence score, has also been pointed out as a potential virulence factor in *T. vaginalis* [17]. On the other hand, Clan CA family C1 cathepsin L-like cysteine peptidases were more abundant in the clone with the lowest initial virulence score. Interestingly, one of these peptidases

was shown to be responsible for the cytopathogenic effect of *T. gallinae* in permanent LMH cell cultures, however the approach (gel-based proteomics) and the analyzed protein sample (cell-free extract which corresponded to secreted proteins) employed in that study were different which might have contributed to the different result [15].

It has been proposed that *T. vaginalis* is able to bind to epithelial cells before transforming into an amoeboid form to increase the cell-to-cell surface contact. This fact implies a high variability of the cytoskeletal proteins [19, 23]. Our results indicate that a similar mechanism could occur in *T. gallinae*. Several peptides of the Ras superfamily small GTPases or components involved in their activation, like RhoGAP domain containing protein, the ARF GAP-like zinc finger containing protein; together with the Ras family protein and RhoGEF domain containing protein, have been identified as more abundant in the clone with the highest initial virulence score. In the clone with the lowest initial virulence score, only peptides mapping to two proteins related with this group were found in higher amounts: the putative small GTP-binding protein and the putative GTPase-activator protein. Overall, small GTPases and components involved in their activation are related to cell differentiation, proliferation (Ras subfamily), cytoskeletal organization, cell motility and oxidative stress (Rho subfamily), vesicle formation and regulation of vesicular trafficking (Rab, ARF and Sar subfamilies) and cell signaling in protozoa [36]. In *E. histolytica*, Rho GTPases, RhoGEFs and Rho effectors regulate the dynamic actin cytoskeleton and are associated with pathogenesis-related processes, such as invasion, migration, phagocytosis and evasion of the host immune response by surface receptor capping. Furthermore, Rab GTPases participate in phagocytosis as well as pinocytosis by the vesicular trafficking system and in the secretion of virulence factors, like amebapores and cysteine proteases in *E. histolytica* [32, 37]. In connection with the Ras superfamily proteins, it is important to note that peptides from a group of proteins involved in cytoskeleton organization, like Tctex-1 family protein or the erythrocyte membrane-associated giant protein antigen 332 containing protein, were more abundant in the membrane of the clone with the highest initial virulence score. These proteins interact with Rho subfamily proteins for regulation of the cytoskeleton re-organization. Also, two putative alpha tubulins, components of the cytoskeleton, were identified as more abundant in this clone. In the clone with delayed virulence, we only found higher amounts of peptides from two cytoskeletal proteins, in a putative profilin and a putative alpha actinin, indicating that re-organization of the cytoskeleton might be one of the mechanisms facilitating the virulence. However, more detailed studies are necessary to confirm this.

It is interesting to note that peptides from three proteins with calmodulin-like predicted function have been identified as more abundant in the clone with the highest initial virulence score. These proteins can be found in organelle membranes and play a role in the activation of phosphorylase kinases or phosphatases, necessary for cytoskeletal re-organization. Calmodulin is involved in the movement of *Giardia intestinalis* [38] and a calmodulin-like protein has been identified in *E. histolytica* playing a role in the phagocytosis of erythrocytes and cytoskeleton dynamics [39].

A group of peptides from proteins implicated in vesicular trafficking, differed in abundance between both clones. In the clone with the highest initial virulence score, peptides from a putative SNARE protein, a CMGC family protein kinase and a SacI homology domain containing protein were more abundant, whereas the opposite situation was observed with dynamin central region family protein and clathrin and vacuolar protein sorting (VPS) domain. All of these proteins are involved in endocytosis or exocytosis processes. The difference in abundance of proteins related to vesicular trafficking might be due to variations in the excretion process or feeding process between both clones including cell phagocytosis, autophagy of other trophozoites and pinocytosis of the culture medium components. Autophagy has been shown to occur



in *T. vaginalis* cultures during the restriction of nutrients [40]. It is also noteworthy that the large group of proteins (n = 7) associated with the carbohydrate metabolism was more abundant in the clone with the lowest initial virulence score in contrast to only one protein in the clone with the highest initial virulence score. This observation can be related to the higher growth rate of the clone with the lowest initial virulence score in TYM medium as compared to the clone with the highest initial virulence score (S1 Fig).

A difference in abundance of peptides from proteins involved in plasmatic and organelles membrane transport was evident: the C2 domain containing protein and Vps52/Sac2 family protein were more abundant in the clone with the highest initial virulence score, whereas the hydrogenosomal carrier protein, the phospholipid-translocating P-type ATPase flippase family protein and the ABC transporter family protein were more abundant in the clone with the lowest initial virulence score. Interestingly, this result is in agreement with de Miguel et al [19], who identified an ABC transporter protein to be more abundant in less adherent isolates of *T. vaginalis*. This fact could also be related to the better growth of the clone with the lowest initial virulence score, since energy processes seem to be more active.

## Conclusions

To the best of our knowledge, this is the first approach to identify and quantify membrane proteins of *T. gallinae*. Differences in the abundance of some peptides between the two clones were analyzed, which provides basic knowledge on disparities of strains within the same parasite species. The differences could be related to the distinct genotype, to the variations in their initial virulence or even to both characteristics. Some of the identified proteins in the present study can be potential virulence factors, similar to their orthologs in *T. vaginalis* and other pathogenic protozoa. Among them, we can highlight the metalloprotease GP63-like, the immuno-dominant variable surface antigen-like, the group of small GTPase Ras superfamily proteins, the calmodulins, the proteases Clan SB family S8 subtilisin-like serine peptidase and the Clan CA family C2 calpain-like cysteine peptidase. The clone with the highest initial virulence had also a higher amount of proteins related to cell adhesion, cytoskeleton organization and membrane and vesicular trafficking processes. On the contrary, the clone with the lowest initial virulence score showed higher abundance of proteins related to metabolic processes, which might be related to the better growth in the medium. These results point towards possible changes in the trophozoite shape of *T. gallinae* in a similar way as the human pathogen *T. vaginalis*.

## Supporting information

**S1 Fig. Growth of P178-13 C7 and R17-12 C1 clones in TYM.** Number of live *T. gallinae* trophozoites/ml from clonal cultures P178-13 C7 and R17-12 C1 in TYM medium. Error bars indicate standard deviation.  
(EPS)

**S2 Fig. SDS-PAGE profile of clones.** SDS-PAGE analysis from the enriched membrane proteins fraction of *T. gallinae* clonal cultures P178-13 C7 P11 (lane 2) and R17-12 C1 P9 (lane 1). MW marker (Precision Plus Protein™ Standards Dual Color de (Biorad, Alcobendas, Spain)) are in line 3.  
(EPS)

**S3 Fig. LC-MS/MS chromatograms.** LC-MS/MS chromatograms from the enriched membrane proteins fraction of *T. gallinae* clonal cultures P178-13 C7 P11 and R17-12 C1 P9.  
(TIF)

**S1 Table. Hypothetical proteins more abundant in P178.** Hypothetical proteins relatively quantified proteins from the enriched membrane proteins fraction for *T. gallinae* clonal cultures that are more abundant in clone P178-13 C7 with two or more identified peptides,  $\geq 3$  fold change and statistical significance (ANOVA,  $p$ -value  $< 0.01$ ). P: number of identified peptides. (n): number of unique, non-conflicting peptides. Score: Total protein score (sum of individual peptides scores).

(PDF)

**S2 Table. Hypothetical proteins more abundant in R17.** Hypothetical proteins relatively quantified proteins from the enriched membrane proteins fraction for *T. gallinae* clonal cultures that are more abundant in clone R17-12 C1 with 2 or more identified peptides,  $\geq 3$  fold change and statistical significance (ANOVA,  $p$ -value  $< 0.01$ ). P: number of identified peptides. (n): number of unique, non-conflicting peptides. Score: Total protein score (sum of individual peptides scores).

(PDF)

**S1 Data. Original data of S1 Fig and Fig 2.** Original Data used to construct graph of S1 Fig.

Original Data used to construct graphs of Fig 2.

(XLSX)

## Acknowledgments

Authors would like to especially thank the staff of the wildlife recovery centre of “La Granja de El Saler” (“Servicio de Vida Silvestre”, “Conselleria de Agricultura, Medio Ambiente, Cambio Climático y Desarrollo Rural”, Generalitat Valenciana, Valencia, Spain) and the bird ringing scientist that collaborated in the sampling of the birds. Special thanks also to the Assistant Professor Oskar Schachner (Vetmeduni, Vienna, Austria) for assisting in taking the photographs of cell cultures.

We are grateful also to the Proteomics facilities of University Complutense of Madrid (Madrid, Spain), that belongs to the ProteoRed network. The following procedures (SDS-PAGE analysis, digestion and desalting of peptides, label free peptide ionization, peptide identification and relative quantification) were carried out at this unit.

Finally, we would like to acknowledge the cooperation in the frame of the research group “GEMAS” from the wildlife veterinary hospital of GREFA-Grupo de Rehabilitación de la Fauna Autóctona y su Hábitat (Madrid, Spain).

## Author Contributions

**Conceptualization:** María del Carmen Martínez-Herrero, María Teresa Gómez-Muñoz.

**Funding acquisition:** María del Carmen Martínez-Herrero, María Magdalena Garijo-Toledo, María Teresa Gómez-Muñoz.

**Investigation:** María del Carmen Martínez-Herrero, Michael Hess, María Teresa Gómez-Muñoz.

**Methodology:** María del Carmen Martínez-Herrero, Fernando González, Ivana Bilic, Dieter Liebhart, Petra Ganas, María Teresa Gómez-Muñoz.

**Supervision:** María Magdalena Garijo-Toledo, Ivana Bilic, Dieter Liebhart, Michael Hess, María Teresa Gómez-Muñoz.

**Writing – original draft:** María del Carmen Martínez-Herrero, María Teresa Gómez-Muñoz.

**Writing – review & editing:** María del Carmen Martínez-Herrero, María Magdalena Garijo-Toledo, Fernando González, Ivana Bilic, Dieter Liebhart, Petra Ganas, Michael Hess, María Teresa Gómez-Muñoz.

## References

1. Amin A, Bilic I, Liebhart D, Hess M. Trichomonads in birds—a review. *Parasitol.* 2014; 41: 733–747.
2. Gerhold RW, Yabsley MJ, Smith AJ, Ostergaard E, Mannan W, Cann JD, et al. Molecular characterization of the *Trichomonas gallinae* morphologic complex in the United States. *J Parasitol.* 2008; 94: 1335–1341. <https://doi.org/10.1645/GE-1585.1> PMID: 18576862
3. Sansano-Maestre J, Garijo-Toledo MM, Gómez-Muñoz MT. Prevalence and genotyping of *Trichomonas gallinae* in pigeons and birds of prey. *Av Pathol.* 2009; 38: 201–207.
4. Grabensteiner E, Bilic I, Kolbe T, Hess M. Molecular analysis of clonal trichomonad isolates indicate the existence of heterogenic species present in different birds and within the same host. *Vet Parasitol.* 2010; 172: 53–64. <https://doi.org/10.1016/j.vetpar.2010.04.015> PMID: 20471174
5. Ecco R, Preis IS, Vilela DA, Luppi MM, Malta MC, Beckstead RB, et al. Molecular confirmation of *Trichomonas gallinae* and other parabasalids from Brazil using the 5.8S and ITS-1 rRNA regions. *Vet Par.* 2012; 190: 36–42.
6. Martínez-Herrero MC, Sansano-Maestre J, López Márquez I, Obón E, Ponce C, González J, et al. Genetic characterization of oropharyngeal trichomonad isolates from wild birds indicates that genotype is associated with host species, diet and presence of pathognomonic lesions. *Av Pathol.* 2014; 43: 535–546.
7. Anderson NL, Grahn RA, Van Hoosear K, BonDurant RH. Studies of trichomonad protozoa in free ranging songbirds: prevalence of *Trichomonas gallinae* in house finches (*Carpodacus mexicanus*) and corvids and a novel trichomonad in mockingbirds (*Mimus polyglottos*). *Vet Parasitol.* 2009; 161: 178–86. <https://doi.org/10.1016/j.vetpar.2009.01.023> PMID: 19278788
8. Girard YA, Rogers KH, Gerhold R, Land KM, Lenaghan SC, Woods LW, et al. *Trichomonas stableri* n. sp., an agent of trichomonosis in Pacific Coast band-tailed pigeons (*Patagioenas fasciata monilis*). *Int J Parasitol Parasit Wildl.* 2013; 3: 32–40.
9. Girard YA, Rogers KH, Woods LW, Chouicha N, Miller WA, Johnson CK. Dual-pathogen etiology of avian trichomonosis in a declining band-tailed pigeon population. *Infect Genet Evol.* 2014; 24: 146–156. <https://doi.org/10.1016/j.meegid.2014.03.002> PMID: 24632451
10. Martínez-Díaz RA, Ponce-Gordo F, Rodríguez-Arce I, Martínez-Herrero MC, González-González F, Molina-López RA, et al. *Trichomonas gypaetini* n. sp., a new trichomonad from the upper gastrointestinal tract of scavenging birds of prey. *Parasitol Res.* 2015; 114: 101–112. <https://doi.org/10.1007/s00436-014-4165-5> PMID: 25273632
11. Sansano-Maestre J, Martínez-Herrero MM, Garijo-Toledo MM, Gómez-Muñoz MT. RAPD analysis and sequencing of ITS1/5.8srRNA/ITS2 and Fe-hydrogenase as tools for genetic classification of potentially pathogenic isolates of *Trichomonas gallinae*. *Res Vet Sci.* 2016; 107: 182–189. <https://doi.org/10.1016/j.rvsc.2016.05.016> PMID: 27473993
12. Lawson B, Cunningham AA, Chantrey J, Hughes LA, John SK, Bunbury N, et al. A clonal strain of *Trichomonas gallinae* is the aetiologic agent of an emerging avian epidemic disease. *Infect Genet Evol.* 2011; 11: 1638–1645. <https://doi.org/10.1016/j.meegid.2011.06.007> PMID: 21712099
13. Chi JF, Lawson B, Durrant C, Beckmann K, John S, Alrefaei AF, et al. The finch epidemic strain of *Trichomonas gallinae* is predominant in British non-passerines. *Parasitol.* 2013; 140: 1234–1245.
14. Amin A, Bilic I, Berger E, Hess M. *Trichomonas gallinae*, in comparison to *Tetratrichomonas gallinarum*, induces distinctive cytopathogenic effects in tissue cultures. *Vet. Parasitol.* 2012; 186: 196–206. <https://doi.org/10.1016/j.vetpar.2011.11.037> PMID: 22172581
15. Amin A, Nöbauer K, Patzl M, Berger E, Hess M, Bilic I. Cysteine peptidases, secreted by *Trichomonas gallinae*, are involved in the cytopathogenic effects on a permanent chicken liver cell culture. *PLoS One.* 2012; 7: e37417. <https://doi.org/10.1371/journal.pone.0037417> PMID: 22649527
16. González-Díaz H, Prado-Prado F, García-Mera X, Alonso N, Abejón P, Caamaño O, et al. MIND-BEST: Web server for drugs and target discovery; Design, synthesis, and assay of MAO-B inhibitors and theoretical-experimental study of G3PDH protein from *Trichomonas gallinae*. *J Proteome Res.* 2011; 10: 1698–1718. <https://doi.org/10.1021/pr101009e> PMID: 21184613
17. Hirt RP, Noel CJ, Sicheritz-Ponten T, Tachezy J, Fiori PL. *Trichomonas vaginalis* surface proteins: a view from the genome. *Trends Parasitol.* 2007; 23: 540–547. <https://doi.org/10.1016/j.pt.2007.08.020> PMID: 17962075

18. Cuervo P, Cupolillo E, Britto C, González LJ, Costa e Silva-Filho F, Coutinho Lopes L, et al. Differential soluble expression between *Trichomonas vaginalis* isolates exhibiting low and high virulence phenotypes. *J Proteomics* 2008; 71: 109–122. <https://doi.org/10.1016/j.jprot.2008.01.010> PMID: 18541479
19. De Miguel N, Lustig G, Twu O, Chattopadhyay A, Wohlschlegel JA, Johnson PJ. Proteome analysis of the surface of *Trichomonas vaginalis* reveals novel proteins and strain-dependent differential expression. *Mol Cell Proteomics*. 2010; 9: 1554–1566. <https://doi.org/10.1074/mcp.M000022-MCP201> PMID: 20467041
20. Ma L, Meng Q, Cheng W, Sung Y, Tang P, Hu S, et al. Involvement of the GP63 protease in infection of *Trichomonas vaginalis*. *Parasitol Res*. 2011; 109: 71–79. <https://doi.org/10.1007/s00436-010-2222-2> PMID: 21221643
21. Ryan CM, de Miguel N, Johnson PJ. *Trichomonas vaginalis*: current understanding of host-parasite interactions. *Ess Biochem*. 2001; 51: 161–175.
22. Dias-Lopes G, Wisniewski JR, Pinho de Souza N, Vidal VE, Padrón G, Britto C, et al. In-Depth quantitative proteomic analysis of trophozoites and pseudocysts of *Trichomonas vaginalis*. *J Proteom Res*. 2018; 17: 3704–3718.
23. Huang K-Y, Huang P-J, Ku F-M, Lin R, Alderete JF, Tang P. Comparative transcriptomic and proteomic analyses of *Trichomonas vaginalis* following adherence to fibronectin. *Infect Immun*. 2012; 80: 3900–3911. <https://doi.org/10.1128/IAI.00611-12> PMID: 22927047
24. Amin A, Neubauer C, Liebhart D, Grabensteiner E, Hess M. Axenization and optimization of in vitro growth of clonal cultures of *Tetratrichomonas gallinarum* and *Trichomonas gallinae*. *Exp Parasitol*. 2010; 124: 202–208. <https://doi.org/10.1016/j.exppara.2009.09.014> PMID: 19766633
25. Felleisen RS. Comparative sequence analysis of 5.8SrRNA genes and internal transcribed spacer (ITS) regions of Trichomonadid protozoa. *Parasitol*. 1997; 115: 111–119.
26. Ganas P, Jaskulska B, Lawson B, Zadavec M, Hess M, Bilic I. Multi-locus sequence typing confirms the clonality of *Trichomonas gallinae* isolates circulating in European finches. *Parasitology*. 2014; 141: 652–661. <https://doi.org/10.1017/S0031182013002023> PMID: 24476813
27. Sechi S, Chait BT. A method to define the carboxyl terminal of proteins. *Anal Chem*. 2000; 72: 3374–3378. <https://doi.org/10.1021/ac000045i> PMID: 10939415
28. Perez-Riverol Y, Csordas A, Bai J, Bernal-Llinares M, Hewapathirana S, Kundu DJ et al. The PRIDE database and related tools and resources in 2019: improving support for quantification data. *Nucleic Acids Res*. 2019; 47:D442–D450. <https://doi.org/10.1093/nar/gky1106> PMID: 30395289
29. Shannon P, Markiel A, Ozier O, Baliga N. Cytoscape: a software environment for integrated models of biomolecular interaction networks. *Genome Res*. 2003; 13: 2948–2950.
30. Carlton JM, Hirt RP, Silva JC, Delcher AL, Schatz M, Zhao Q, et al. Draft genome sequence of the sexually transmitted pathogen *Trichomonas vaginalis*. *Science*. 2007; 315: 207–212. <https://doi.org/10.1126/science.1132894> PMID: 17218520
31. Hernández-Sánchez J, Fonseca-Liñán R, Salinas-Tobón M del R, Ortega-Pierres G. *Giardia duodenalis*: adhesión-deficient clones have reduced ability to establish infection in Mongolian gerbils. *Exp Parasitol*. 2008; 119: 364–372. <https://doi.org/10.1016/j.exppara.2008.03.010> PMID: 18456259
32. Emmanuel M, Nakano YS, Nozaki T, Datta S. Small GTPase Rab21 mediates fibronectin induced actin reorganization in *Entamoeba histolytica*: implications in pathogen invasion. *PLoS Pathog*. 2015; 11: e1004666. <https://doi.org/10.1371/journal.ppat.1004666> PMID: 25730114
33. Colingridge Peter W., Brown Robert W.B., Ginger Michael L. Moonlighting enzymes in parasitic protozoa. *Parasitology* 2009; 138: 1467–1475.
34. Amblee V, Jeffery CJ. Physical features of intracellular proteins that moonlight o the cell surface. *PLoS One*. 2015; 10: e0130575. <https://doi.org/10.1371/journal.pone.0130575> PMID: 26110848
35. Tewari R, Bailes E, Bunting KA, Coates JC. Armadillo-repeat protein functions: questions for little creatures. *Trends Cell Biol*. 2010; 20: 470–481. <https://doi.org/10.1016/j.tcb.2010.05.003> PMID: 20688255
36. Field MC, Ali BRS and Field H. GTPases in protozoan parasites: tools for cell biology chemotherapy. *Parasitol Today*. 1999; 15: 365–71.29. [https://doi.org/10.1016/s0169-4758\(99\)01499-4](https://doi.org/10.1016/s0169-4758(99)01499-4) PMID: 10461165
37. Bosch DE, Siderovski DP. G protein signaling in the parasite *Entamoeba histolytica*. *Exp Mol Med*. 2013; 45: e15. <https://doi.org/10.1038/emm.2013.30> PMID: 23519208
38. Alvarado ME, Wasserman M. Calmodulin expression during *Giardia intestinalis* differentiation and identification of calmodulin-binding proteins during the trophozoite stage. *Parasitol Res*. 2012; 110: 1371–1380. <https://doi.org/10.1007/s00436-011-2637-4> PMID: 21927871
39. Aslam S, Bhattacharya S, Bhattacharya A. The Calmodulin-like calcium binding protein EhCaBP3 of *Entamoeba histolytica* regulates phagocytosis and is involved in actin dynamics. *PLoS Pathog*. 2012; 8: e1003055. <https://doi.org/10.1371/journal.ppat.1003055> PMID: 23300437

40. Huang KY, Chen YY, Fang YK, Cheng WH, Cheng CC, Chen YC, et al. Adaptive responses to glucose restriction enhance cell survival, antioxidant capability, and autophagy of the protozoan parasite *Trichomonas vaginalis*. *Biochim Biophys Acta*. 2014. 1840; 53–64. <https://doi.org/10.1016/j.bbagen.2013.08.008> PMID: [23958562](https://pubmed.ncbi.nlm.nih.gov/23958562/)
