# Supplementary material for: Membrane associated proteins of two Trichomonas gallinae clones vary with the virulence
Source: PubMed Central journal article supplement (PMC6812828; doi:10.1371/journal.pone.0224032), 2019-10-24
Supplement: pone.0224032.s004.pdf [file pone.0224032.s004.pdf]

**Hypothetical proteins up-regulated in P178.** Hypothetical proteins relatively quantified proteins from membrane and organelle membrane fraction for *T. gallinae* clonal cultures that are more abundant in clone P178-13 C7 with two or more identified peptides,  $\geq 3$  fold change and statistical significance (ANOVA,  $p$ -value  $< 0.01$ ). P: number of identified peptides. (n): number of unique, non-conflicting peptides. Score: Total protein score (sum of individual peptides scores).

| Predicted Function          | Fold Change | Category            | Description                                                 | P     | Score | P178-13  | R17-12   | $p$ -value | Accession Number |
|-----------------------------|-------------|---------------------|-------------------------------------------------------------|-------|-------|----------|----------|------------|------------------|
| Binding of large substrates | 10          | Cellular metabolism | hypothetical protein TVAG_109510 [Trichomonas vaginalis G3] | 2 (2) | 29,24 | 4,60E+05 | 4,60E+04 | 3,33E-04   | gi 121905439     |
| Binding of large substrates | 3,83        | Cellular metabolism | hypothetical protein TVAG_028120 [Trichomonas vaginalis G3] | 2 (2) | 30,5  | 2,67E+04 | 6960,72  | 1,76E-04   | gi 121907365     |
| Cell adhesion               | 31,76       | Cell adhesion       | hypothetical protein TVAG_130090 [Trichomonas vaginalis G3] | 2 (2) | 32,04 | 3,18E+04 | 1000,03  | 1,82E-03   | gi 121915109     |
| Cell adhesion               | 7,25        | Cell adhesion       | conserved hypothetical protein [Trichomonas vaginalis G3]   | 2 (2) | 27,97 | 4,96E+05 | 6,84E+04 | 8,08E-06   | gi 121890028     |
| Cell adhesion               | 3,65        | Cell adhesion       | hypothetical protein TVAG_457560 [Trichomonas vaginalis G3] | 2 (2) | 28,54 | 7,44E+04 | 2,04E+04 | 3,02E-04   | gi 121917345     |
| Cytoskeleton                | 12,34       | Cellular component  | hypothetical protein TVAG_208940 [Trichomonas vaginalis G3] | 3 (3) | 45,13 | 5,98E+04 | 4845,66  | 9,04E-06   | gi 121910773     |
| Cytoskeleton                | 9,25        | Cellular component  | hypothetical protein TVAG_110590 [Trichomonas vaginalis G3] | 4 (4) | 54,08 | 2,93E+04 | 3163,73  | 7,36E-05   | gi 121915660     |
| Cytoskeleton                | 8,62        | Cellular component  | hypothetical protein TVAG_454480 [Trichomonas vaginalis G3] | 2 (2) | 33,83 | 1,15E+04 | 1337,43  | 4,29E-04   | gi 121898727     |
| Cytoskeleton                | 6           | Cellular component  | hypothetical protein TVAG_252220 [Trichomonas vaginalis G3] | 3 (3) | 42,53 | 2,22E+05 | 3,70E+04 | 6,78E-05   | gi 121910564     |
| Cytoskeleton                | 5,74        | Cellular component  | hypothetical protein TVAG_169860 [Trichomonas vaginalis G3] | 3 (3) | 54,45 | 5,49E+04 | 9577,77  | 1,16E-04   | gi 121912858     |
| Cytoskeleton                | 5,38        | Cellular component  | hypothetical protein TVAG_329890 [Trichomonas vaginalis G3] | 2 (2) | 27,58 | 9,73E+04 | 1,81E+04 | 8,69E-06   | gi 121887190     |
| Cytoskeleton                | 4,16        | Cellular component  | hypothetical protein TVAG_021520 [Trichomonas vaginalis G3] | 2 (2) | 40,01 | 1,35E+05 | 3,23E+04 | 6,41E-04   | gi 121915416     |

|                                       |       |                     |                                                                |       |        |          |          |          |              |
|---------------------------------------|-------|---------------------|----------------------------------------------------------------|-------|--------|----------|----------|----------|--------------|
| Cytoskeleton                          | 3,84  | Cellular component  | hypothetical protein TVAG_477720<br>[Trichomonas vaginalis G3] | 2 (2) | 45,1   | 2,78E+05 | 7,25E+04 | 4,09E-03 | gi 121882914 |
| Vacuole protein                       | 8,21  | Cellular component  | hypothetical protein TVAG_238570<br>[Trichomonas vaginalis G3] | 3 (3) | 45,97  | 1,82E+05 | 2,21E+04 | 4,93E-04 | gi 121915699 |
| Metal ion binding                     | 8,23  | Cellular metabolism | hypothetical protein TVAG_276700<br>[Trichomonas vaginalis G3] | 2 (2) | 37,03  | 2,29E+05 | 2,79E+04 | 1,68E-05 | gi 121891036 |
| Mitochondrial transport               | 6,98  | Cellular component  | hypothetical protein TVAG_548390<br>[Trichomonas vaginalis G3] | 2 (2) | 30,34  | 1,34E+05 | 1,91E+04 | 1,35E-04 | gi 121841176 |
| Oesophageal cancer-associated protein | 19,6  | Cell adhesion       | hypothetical protein TVAG_008090<br>[Trichomonas vaginalis G3] | 2 (2) | 36,49  | 1,26E+05 | 6403,58  | 3,63E-07 | gi 121897688 |
| Peptidase                             | 3,23  | Cellular metabolism | hypothetical protein TVAG_051850<br>[Trichomonas vaginalis G3] | 2 (2) | 43,6   | 3,61E+04 | 1,12E+04 | 1,35E-04 | gi 121889871 |
| Phospholipid synthesis                | 3,07  | Cellular metabolism | hypothetical protein TVAG_407170<br>[Trichomonas vaginalis G3] | 6 (6) | 348,73 | 2,85E+05 | 9,28E+04 | 2,69E-05 | gi 121895175 |
| Protein binding                       | 5,2   | Cellular metabolism | hypothetical protein TVAG_436440<br>[Trichomonas vaginalis G3] | 2 (2) | 37,45  | 6,51E+04 | 1,25E+04 | 4,47E-04 | gi 121916037 |
| Protein metabolism                    | 6,83  | Cellular metabolism | hypothetical protein TVAG_107620<br>[Trichomonas vaginalis G3] | 2 (2) | 62,43  | 2,16E+04 | 3163,05  | 2,65E-06 | gi 121896349 |
| Protein metabolism                    | 3,01  | Cellular metabolism | conserved hypothetical protein<br>[Trichomonas vaginalis G3]   | 2 (2) | 44,55  | 8215,11  | 2729,95  | 5,01E-06 | gi 121890884 |
| Protein targeting to Golgi            | 8,23  | Cellular metabolism | hypothetical protein TVAG_201650<br>[Trichomonas vaginalis G3] | 2 (2) | 29,22  | 6770,17  | 822,38   | 2,96E-04 | gi 121910323 |
| Protein-protein interaction           | 46,22 | Cellular metabolism | hypothetical protein TVAG_147380<br>[Trichomonas vaginalis G3] | 2 (2) | 32,88  | 4,88E+05 | 1,05E+04 | 1,01E-05 | gi 121880636 |
| Protein-protein interaction           | 5,62  | Cellular metabolism | hypothetical protein TVAG_093700<br>[Trichomonas vaginalis G3] | 3 (3) | 41,23  | 4,05E+04 | 7208,38  | 1,75E-06 | gi 121917422 |
| Protein-protein interaction           | 4,06  | Cellular metabolism | hypothetical protein TVAG_075500<br>[Trichomonas vaginalis G3] | 2 (2) | 31,87  | 1,96E+05 | 4,82E+04 | 1,13E-05 | gi 121918033 |
| Ribosomal large subunit assembly      | 6,02  | Cellular component  | hypothetical protein TVAG_464510<br>[Trichomonas vaginalis G3] | 2 (2) | 37,7   | 4,56E+04 | 7570,82  | 3,91E-06 | gi 121903946 |
| Ribosomal large subunit assembly      | 3,36  | Cellular component  | hypothetical protein TVAG_470660<br>[Trichomonas vaginalis G3] | 5 (5) | 89,09  | 1,69E+05 | 5,03E+04 | 2,62E-05 | gi 121901205 |
| Ribosomal large subunit assembly      | 3,28  | Cellular component  | hypothetical protein TVAG_476450<br>[Trichomonas vaginalis G3] | 3 (3) | 47,7   | 1,98E+05 | 6,02E+04 | 2,32E-03 | gi 121917945 |

|                     |       |                     |                                                             |       |        |          |          |          |              |
|---------------------|-------|---------------------|-------------------------------------------------------------|-------|--------|----------|----------|----------|--------------|
| RNA processing      | 7,59  | Cellular component  | conserved hypothetical protein [Trichomonas vaginalis G3]   | 2 (2) | 56,49  | 4,09E+04 | 5381,27  | 2,58E-06 | gi 121899537 |
| Signal transduction | 3,67  | Signal transduction | hypothetical protein TVAG_530150 [Trichomonas vaginalis G3] | 2 (2) | 38,53  | 1,52E+05 | 4,13E+04 | 1,15E-04 | gi 121877483 |
| Transcription       | 10,47 | Cellular metabolism | hypothetical protein TVAG_285400 [Trichomonas vaginalis G3] | 2 (2) | 37,86  | 1,72E+04 | 1639,41  | 8,33E-05 | gi 121859384 |
| Translation         | 6,9   | Translation         | hypothetical protein TVAG_184380 [Trichomonas vaginalis G3] | 2 (2) | 36,51  | 3,65E+05 | 5,29E+04 | 1,93E-04 | gi 121905611 |
| Translation         | 5,68  | Translation         | hypothetical protein TVAG_016880 [Trichomonas vaginalis G3] | 9 (9) | 453,74 | 1,17E+06 | 2,06E+05 | 9,26E-05 | gi 121899865 |
| Translation         | 3,86  | Translation         | hypothetical protein TVAG_266630 [Trichomonas vaginalis G3] | 4 (4) | 259,78 | 6,39E+04 | 1,66E+04 | 4,27E-06 | gi 121912479 |
| Unknown             | 71,88 | Unknown             | hypothetical protein TVAG_073850 [Trichomonas vaginalis G3] | 2 (2) | 27,16  | 3,60E+05 | 5001,77  | 2,10E-06 | gi 121904064 |
| Unknown             | 38,77 | Unknown             | hypothetical protein TVAG_468600 [Trichomonas vaginalis G3] | 2 (2) | 28,26  | 6,93E+05 | 1,79E+04 | 6,75E-07 | gi 121894474 |
| Unknown             | 34,83 | Unknown             | hypothetical protein TVAG_437390 [Trichomonas vaginalis G3] | 2 (2) | 30,01  | 9,06E+05 | 2,60E+04 | 3,27E-06 | gi 121916130 |
| Unknown             | 33,62 | Unknown             | hypothetical protein TVAG_107130 [Trichomonas vaginalis G3] | 2 (2) | 39,66  | 1,78E+04 | 529,75   | 2,08E-05 | gi 121891496 |
| Unknown             | 30,06 | Unknown             | hypothetical protein TVAG_398490 [Trichomonas vaginalis G3] | 3 (3) | 47,12  | 5,19E+05 | 1,73E+04 | 9,12E-06 | gi 121886424 |
| Unknown             | 26,1  | Unknown             | hypothetical protein TVAG_237830 [Trichomonas vaginalis G3] | 2 (2) | 33,96  | 5,68E+04 | 2176,18  | 1,82E-05 | gi 121916980 |
| Unknown             | 25,28 | Unknown             | hypothetical protein TVAG_431160 [Trichomonas vaginalis G3] | 2 (2) | 36,23  | 2,02E+04 | 797,16   | 1,28E-06 | gi 121896835 |
| Unknown             | 23,96 | Unknown             | hypothetical protein TVAG_343940 [Trichomonas vaginalis G3] | 2 (2) | 32,59  | 1,42E+05 | 5940,33  | 2,39E-07 | gi 121906390 |
| Unknown             | 11,09 | Unknown             | hypothetical protein TVAG_474360 [Trichomonas vaginalis G3] | 3 (3) | 66,75  | 4,52E+04 | 4075,46  | 9,98E-07 | gi 121899160 |
| Unknown             | 10,63 | Unknown             | hypothetical protein TVAG_145680 [Trichomonas vaginalis G3] | 2 (2) | 31,61  | 8,98E+04 | 8450,01  | 2,49E-04 | gi 121903522 |
| Unknown             | 10,31 | Unknown             | hypothetical protein TVAG_050140 [Trichomonas vaginalis G3] | 2 (2) | 38,37  | 2,33E+04 | 2258,32  | 4,77E-06 | gi 121902205 |

|         |       |         |                                                             |       |       |          |          |          |              |
|---------|-------|---------|-------------------------------------------------------------|-------|-------|----------|----------|----------|--------------|
| Unknown | 10,08 | Unknown | hypothetical protein TVAG_411320 [Trichomonas vaginalis G3] | 2 (2) | 43,82 | 1,38E+05 | 1,36E+04 | 3,38E-06 | gi 121910013 |
| Unknown | 10,06 | Unknown | hypothetical protein TVAG_346840 [Trichomonas vaginalis G3] | 2 (2) | 35,55 | 1,03E+05 | 1,03E+04 | 1,52E-06 | gi 121892389 |
| Unknown | 9,83  | Unknown | trichohyalin, putative [Trichomonas vaginalis G3]           | 2 (2) | 34,76 | 2,48E+05 | 2,53E+04 | 4,74E-06 | gi 121890270 |
| Unknown | 9,34  | Unknown | unknown [Trichomonas vaginalis]                             | 2 (2) | 50,84 | 2,48E+04 | 2658,03  | 1,56E-04 | gi 8886406   |
| Unknown | 8,69  | Unknown | hypothetical protein TVAG_123890 [Trichomonas vaginalis G3] | 5 (5) | 91,09 | 2,15E+05 | 2,48E+04 | 2,21E-07 | gi 121900942 |
| Unknown | 7,01  | Unknown | hypothetical protein TVAG_324880 [Trichomonas vaginalis G3] | 3 (3) | 43,43 | 3,55E+05 | 5,07E+04 | 3,81E-06 | gi 121896216 |
| Unknown | 6,9   | Unknown | hypothetical protein TVAG_484970 [Trichomonas vaginalis G3] | 2 (2) | 35,41 | 3,85E+04 | 5571,69  | 3,74E-05 | gi 121880058 |
| Unknown | 6,86  | Unknown | hypothetical protein TVAG_080900 [Trichomonas vaginalis G3] | 3 (3) | 70,53 | 4,95E+05 | 7,22E+04 | 1,94E-04 | gi 121900462 |
| Unknown | 6,86  | Unknown | hypothetical protein TVAG_354770 [Trichomonas vaginalis G3] | 2 (2) | 33,78 | 1,51E+04 | 2207,47  | 4,52E-05 | gi 121903451 |
| Unknown | 6,67  | Unknown | hypothetical protein TVAG_092160 [Trichomonas vaginalis G3] | 2 (2) | 32,51 | 2,92E+05 | 4,37E+04 | 2,55E-06 | gi 121885070 |
| Unknown | 6,36  | Unknown | hypothetical protein TVAG_090740 [Trichomonas vaginalis G3] | 4 (4) | 69,63 | 3,51E+05 | 5,52E+04 | 3,33E-05 | gi 121893329 |
| Unknown | 6,29  | Unknown | hypothetical protein TVAG_034750 [Trichomonas vaginalis G3] | 2 (2) | 44,13 | 3,11E+04 | 4946,4   | 1,14E-06 | gi 121889632 |
| Unknown | 5,77  | Unknown | hypothetical protein TVAG_420130 [Trichomonas vaginalis G3] | 2 (2) | 35,41 | 9,36E+04 | 1,62E+04 | 3,57E-04 | gi 121904444 |
| Unknown | 5,48  | Unknown | hypothetical protein TVAG_454150 [Trichomonas vaginalis G3] | 3 (3) | 59,95 | 9,60E+04 | 1,75E+04 | 1,22E-05 | gi 121912769 |
| Unknown | 5,06  | Unknown | hypothetical protein TVAG_420220 [Trichomonas vaginalis G3] | 2 (2) | 32,07 | 2,24E+05 | 4,43E+04 | 9,75E-04 | gi 121904453 |
| Unknown | 4,99  | Unknown | hypothetical protein TVAG_249590 [Trichomonas vaginalis G3] | 2 (2) | 34,48 | 4,54E+04 | 9097,28  | 1,04E-04 | gi 121917123 |
| Unknown | 4,72  | Unknown | hypothetical protein TVAG_374940 [Trichomonas vaginalis G3] | 3 (3) | 83,67 | 2,95E+04 | 6247,27  | 2,64E-06 | gi 121885719 |

|         |      |         |                                                                |       |        |          |          |          |              |
|---------|------|---------|----------------------------------------------------------------|-------|--------|----------|----------|----------|--------------|
| Unknown | 4,66 | Unknown | hypothetical protein TVAG_425440<br>[Trichomonas vaginalis G3] | 2 (2) | 26,83  | 6,65E+04 | 1,43E+04 | 4,10E-06 | gi 121882729 |
| Unknown | 4,6  | Unknown | conserved hypothetical protein<br>[Trichomonas vaginalis G3]   | 2 (2) | 28,07  | 3,64E+04 | 7908,32  | 1,35E-06 | gi 121903532 |
| Unknown | 4,41 | Unknown | hypothetical protein TVAG_248380<br>[Trichomonas vaginalis G3] | 2 (2) | 36,55  | 1,79E+04 | 4056,04  | 4,11E-05 | gi 121906564 |
| Unknown | 4,39 | Unknown | conserved hypothetical protein<br>[Trichomonas vaginalis G3]   | 2 (2) | 36,44  | 5,76E+04 | 1,31E+04 | 9,43E-06 | gi 121910686 |
| Unknown | 4,37 | Unknown | hypothetical protein TVAG_103950<br>[Trichomonas vaginalis G3] | 3 (3) | 54,5   | 7,85E+04 | 1,79E+04 | 7,59E-07 | gi 121888190 |
| Unknown | 3,95 | Unknown | hypothetical protein TVAG_009150<br>[Trichomonas vaginalis G3] | 2 (2) | 28,39  | 8,08E+04 | 2,04E+04 | 1,32E-07 | gi 121881711 |
| Unknown | 3,86 | Unknown | hypothetical protein TVAG_391180<br>[Trichomonas vaginalis G3] | 2 (2) | 28,47  | 4,60E+04 | 1,19E+04 | 1,88E-05 | gi 121915950 |
| Unknown | 3,83 | Unknown | hypothetical protein TVAG_429790<br>[Trichomonas vaginalis G3] | 2 (2) | 77,15  | 1,63E+05 | 4,27E+04 | 4,88E-03 | gi 121889097 |
| Unknown | 3,76 | Unknown | hypothetical protein TVAG_231340<br>[Trichomonas vaginalis G3] | 2 (2) | 39,8   | 5,29E+04 | 1,41E+04 | 6,26E-05 | gi 121895616 |
| Unknown | 3,69 | Unknown | hypothetical protein TVAG_250870<br>[Trichomonas vaginalis G3] | 2 (2) | 36,5   | 3,37E+04 | 9124,25  | 4,60E-04 | gi 121889502 |
| Unknown | 3,52 | Unknown | hypothetical protein TVAG_497970<br>[Trichomonas vaginalis G3] | 2 (2) | 37,47  | 2,26E+05 | 6,43E+04 | 1,68E-05 | gi 121885514 |
| Unknown | 3,5  | Unknown | hypothetical protein TVAG_034380<br>[Trichomonas vaginalis G3] | 3 (3) | 51,15  | 1,64E+05 | 4,68E+04 | 1,72E-03 | gi 121901242 |
| Unknown | 3,48 | Unknown | hypothetical protein TVAG_132560<br>[Trichomonas vaginalis G3] | 2 (2) | 29,99  | 5,76E+05 | 1,65E+05 | 2,02E-03 | gi 121886642 |
| Unknown | 3,47 | Unknown | hypothetical protein TVAG_286280<br>[Trichomonas vaginalis G3] | 2 (2) | 70,56  | 3,36E+04 | 9673,65  | 2,13E-04 | gi 121900413 |
| Unknown | 3,44 | Unknown | hypothetical protein TVAG_440200<br>[Trichomonas vaginalis G3] | 3 (3) | 211,22 | 3,89E+05 | 1,13E+05 | 1,66E-03 | gi 121891682 |
| Unknown | 3,4  | Unknown | hypothetical protein TVAG_066230<br>[Trichomonas vaginalis G3] | 2 (2) | 29,36  | 2,55E+05 | 7,50E+04 | 4,71E-04 | gi 121885580 |
| Unknown | 3,22 | Unknown | hypothetical protein TVAG_222340<br>[Trichomonas vaginalis G3] | 3 (3) | 61,94  | 1,25E+05 | 3,87E+04 | 7,55E-05 | gi 121883477 |

|         |      |         |                                                                |       |       |          |          |          |              |
|---------|------|---------|----------------------------------------------------------------|-------|-------|----------|----------|----------|--------------|
| Unknown | 3,16 | Unknown | hypothetical protein TVAG_085630<br>[Trichomonas vaginalis G3] | 2 (2) | 38,97 | 1,30E+05 | 4,11E+04 | 9,40E-04 | gi 121895549 |
| Unknown | 3,11 | Unknown | hypothetical protein TVAG_295140<br>[Trichomonas vaginalis G3] | 2 (2) | 46,18 | 2,83E+04 | 9097,47  | 0,01     | gi 121914059 |
| Unknown | 3,08 | Unknown | hypothetical protein TVAG_013740<br>[Trichomonas vaginalis G3] | 3 (3) | 58,34 | 1,09E+05 | 3,54E+04 | 2,40E-03 | gi 121916831 |
| Unknown | 3,05 | Unknown | hypothetical protein TVAG_415360<br>[Trichomonas vaginalis G3] | 2 (2) | 34,89 | 5,79E+04 | 1,90E+04 | 1,44E-06 | gi 121897998 |
